1 **Influence of the artificial sodium saccharin sweetener Sucram<sup>®</sup> on**  
2 **the microbial community composition in the rumen content and**  
3 **attached to the rumen epithelium in dairy cattle: A pilot study**

4  
5 Lucas R. Koester<sup>1,2</sup>, Chiron J. Anderson<sup>2,3</sup>, Bienvenido W. Cortes<sup>2,3</sup>, Mark Lyte<sup>1</sup>, Stephan  
6 Schmitz-Esser<sup>2,3</sup>

7  
8 **Affiliations**

9 <sup>1</sup> Iowa State University, Department of Veterinary Microbiology and Preventive Medicine,  
10 Ames, IA, USA

11 <sup>2</sup> Iowa State University, Interdepartmental Microbiology Graduate Program, Ames, IA, USA

12 <sup>3</sup> Iowa State University, Department of Animal Science, Ames, IA, USA

13  
14 **Corresponding author:**

15 Dr. Stephan Schmitz-Esser, Iowa State University, Department of Animal Science, Ames, IA,  
16 USA

17  
18 **Key words:** Rumen, rumen epithelium, microbiota, Sucram<sup>®</sup>, artificial sweetener, dairy cattle

19 **Short title:** Saccharin-based artificial sweetener induces changes in rumen microbiota

## 20 **Abstract**

21           The products of rumen microbial fermentations are considered essential for animal growth  
22 and performance. Changes in these microbial communities can have major effects on animal  
23 growth and performance. Saccharin-based artificial sweeteners can be included in livestock diets  
24 to increase palatability and encourage feed intake. Despite the importance of the rumen microbial  
25 fermentation, little or no research is available regarding how saccharin-based artificial sweeteners  
26 affect rumen content and rumen epithelial microbial communities. The aim of this study was to  
27 identify changes in both the rumen content and rumen epithelial microbial communities in  
28 response to the supplementation of Sucram<sup>®</sup>, a sodium-saccharin-based sweetener (Pancosma  
29 S.A./ADM Groups, Rolle, Switzerland) during standard, non-stress conditions using 16SrRNA  
30 gene amplicon sequencing.

31           The rumen epithelial and rumen content microbiota of five Holstein-Friesian milking dairy  
32 cattle were compared before (baseline, BL) and after a 28-day supplementation of Sucram<sup>®</sup>.  
33 Illumina MiSeq-based 16S rRNA gene sequencing was conducted, and community analysis  
34 revealed significant changes in the abundance of specific phylotypes when comparing BL to  
35 Sucram<sup>®</sup> experimental groups. Sucram<sup>®</sup> did not have a significant effect on overall rumen  
36 microbial community structure between experimental groups. Statistically significant changes in  
37 microbial community composition following Sucram<sup>®</sup> supplementation were observed most  
38 consistently across a number of bacterial taxa in the rumen epithelium, while fewer changes were  
39 seen in the rumen content. Predicted genomic potentials of several significantly different OTUs  
40 were mined for genes related to feed efficiency and saccharin degradation. Operational taxonomic  
41 units (OTUs) classified as *Prevotella* and *Sharpea* were significantly ( $p < 0.05$ ) increased in  
42 samples supplemented with Sucram<sup>®</sup>, whereas a reduction in abundance was seen for OTUs

43 classified as *Treponema*, *Leptospiraceae*, *Ruminococcus* and methanogenic archaea. This is the  
44 first study to report an effect of Sucram<sup>®</sup> on ruminant microbial communities, suggesting possible  
45 beneficial impacts of Sucram<sup>®</sup> on animal health and performance that may extend beyond  
46 increasing feed palatability.

47

## 48 **Introduction**

49 Sucram<sup>®</sup> (Pancosma, S.A./ADM Groups, Rolle, Switzerland), is a sodium-saccharin-based  
50 sweetener which has been approved for use in a range of livestock species including milking dairy  
51 cattle. A number of recent publications have described the effect of Sucram<sup>®</sup> on growth  
52 performance in cattle [1, 2], and suggest increases in average daily gain and feed intake during  
53 stress conditions when feed is supplemented with Sucram<sup>®</sup>. The effects of artificial sweeteners  
54 such as Sucram<sup>®</sup> on mammalian GI microbiomes have increasingly been studied over the last few  
55 years as a possible mechanistic pathway by which these food additives may influence host  
56 physiology. Several studies have described alterations in the microbiome caused by the inclusion  
57 of artificial sweeteners in monogastric animals and humans [3-11]. However, little to no research  
58 into if saccharin-based artificial sweeteners affect the GI microbiota of ruminants is currently  
59 available.

60 The microbial communities in the gastrointestinal tract (GI) of mammals have profound  
61 effects on health and performance. GI tract microbial communities of ruminants perform important  
62 roles in host metabolism (i.e. cellulose degradation) [12] and are largely distinct from those found  
63 in monogastric species. Rumen microbial fermentation provides key metabolic products for the  
64 host animal such as short chain fatty acids (SCFA) and vitamins via the breakdown of cellulose,

65 hemicellulose, pectin and other ingested feed [13, 14]. These microbial metabolic products are  
66 absorbed directly by the host through the rumen epithelial tissue. More generally, the integrity of  
67 the rumen epithelial tissue is essential for animal health and performance as a decrease in rumen  
68 epithelial tissue integrity can result in inflammation and symptoms referred to as “leaky gut” [15,  
69 16]. Modulation of the GI tract microbiome to improve ruminant livestock feed efficiency and  
70 health is of great interest to livestock producers, and as antibiotics usage in the livestock industry  
71 decreases, alternative feed additives, such as pre- and probiotics, are being explored. Artificial  
72 sweeteners have not been examined in this context until now.

73         Rumen microorganisms have been characterized as two main groups; rumen epithelial  
74 microorganisms and rumen content microorganisms [17-21]. Currently, there are very few studies  
75 that focus on the rumen epithelium microbial communities and their potential effects on the host.  
76 Rumen epithelial microorganisms are often considered less transient than their luminal  
77 counterparts, suggesting a more stable community that possibly interacts with the host through a  
78 variety of yet undiscovered ways [20]. As the rumen epithelium is a major site of nutrient exchange  
79 between the rumen content and the animal host, the close proximity of the rumen epithelium  
80 microbial communities to the host tissue suggests the rumen wall microbes may influence nutrient  
81 exchange or signaling to the host [21, 22]. Additionally, the rumen epithelial microbial  
82 communities may play an additional role in important metabolic functions such as nitrogen  
83 metabolism, sulfate reduction, and oxygen scavenging [23]. Rumen content microbial  
84 communities include the microorganisms attached to particulate matter and those who are  
85 planktonic within the liquid phase of the rumen content. These microorganisms are known to be  
86 integral for fiber-degradation and feed digestion [24, 25]. Each of these distinct groups are key to

87 metabolic processes in the host, and the differences between the two should be considered when  
88 conducting a rumen microbial analysis.

89         Until now, the effect of Sucram<sup>®</sup>, or that of any other sweetener-based food additive, on  
90 rumen microbiota composition has not been analyzed. This study aimed to provide preliminary  
91 data to determine changes in the rumen content and rumen epithelium bacterial communities, in  
92 response to supplementation of Sucram<sup>®</sup> in dairy cows under standard, non-stressful, physiological  
93 conditions. As a pilot study, targeting possible effects of Sucram<sup>®</sup> on microbial community  
94 composition, we did not aim for identifying possible effects of Sucram<sup>®</sup> on feed intake or feed  
95 efficiency. Given that the ruminant microbiome is critical to animal health and performance and  
96 that there is very little general knowledge of microbial organisms inhabiting the rumen epithelium,  
97 exploring the effects of Sucram<sup>®</sup> on ruminant microbial communities may lead to improved  
98 understanding of the factors which influence feed efficiency and ultimately lead to better animal  
99 health.

100

## 101 **Materials and methods**

### 102 **Ethics statement**

103 All animal procedures in this study were conducted under approval of the Animal Care and Use  
104 Committee at Iowa State University (ISU) (IACUC# 1-18-8670-B).

105

### 106 **Animal trial**

107         Five rumen fistulated, lactating Holstein-Friesian dairy cows housed at the Iowa State  
108 University (ISU) dairy teaching farm were included in this trial. To study the effect of the artificial

109 sweetener Sucram<sup>®</sup> C-150 (Pancosma S.A./ADM Groups, Rolle, Switzerland) on rumen content  
110 and rumen epithelium microbial communities, each animal was sampled before (baseline, BL) and  
111 after 28 days of Sucram<sup>®</sup> C-150 feeding. In this way, each animal acted as its own control (BL,  
112 pre-exposure to Sucram<sup>®</sup> C-150) when analyzing potential effects of the compound on rumen  
113 microbial communities. Animals were housed together under identical conditions at the ISU dairy  
114 farm. All cows received the ISU dairy farm regular diet comprised of ground corn, soybeans,  
115 cottonseed hulls, corn silage, baleage and alfalfa hay (53.8% dry matter (DM), 9.46% crude protein  
116 (CP), and 13.91% neutral detergent fiber (NDF)). Details of the analysis and chemical composition  
117 of the diet are given in Supplementary Table S1. The Sucram<sup>®</sup> experimental group cows were  
118 given 2 grams of Sucram<sup>®</sup> suspended in 10 ml of 1x sterile phosphate buffered saline (PBS) (final  
119 concentration: 0.2g/ml) per day and cow as per feeding protocols provided by Pancosma. The  
120 Sucram<sup>®</sup> C-150 containing solution was added directly through the fistula to ensure all cows  
121 consistently received the same amount of sweetener. Our main aim was to identify if the presence  
122 of Sucram<sup>®</sup> has an influence on rumen microbial communities, and due to the administration  
123 procedure of Sucram<sup>®</sup> through the fistula, any sensory stimuli (i.e. taste or smell) would be limited  
124 in this experimental setup. Consequently, Sucram<sup>®</sup> would not have an effect on feed intake as it  
125 wasn't mixed with the feed by-passing any sensory stimuli. Thus, we did not measure feed intake,  
126 average daily gain or milk yield in response to administration of Sucram<sup>®</sup> for this study.

127 Two sample types were taken for this trial: rumen content, and rumen epithelium biopsies,  
128 taken from the dorsal part of the rumen wall, both collected directly through the fistula. Rumen  
129 epithelium biopsies were collected using Chevalier Jackson forceps from three locations (separated  
130 vertically by 10 cm) in the dorsal rumen sac and were combined to provide a more representative  
131 sample of rumen wall microbial communities. Rumen epithelial biopsy samples were briefly rinsed

132 in sterile 1x PBS, immediately snap frozen in liquid nitrogen on site and placed in sterile, 2 ml  
133 screw-top centrifuge tubes. Approximately 12 ml of rumen content was collected in 15 ml sterile  
134 conical tubes and frozen on site on dry ice immediately after retrieval. All samples were stored at  
135 -80°C after collection.

136 Rumen epithelium and content samples were thawed, and genomic DNA was extracted  
137 from approximately 0.1 grams of rumen epithelial sample and approx. 0.2 grams of rumen content  
138 sample using the Qiagen DNeasy Powerlyzer Powersoil kit following the manufacturer's  
139 instructions. Mechanical cell lysis was performed using a Fischer Scientific Beadmill 24, and DNA  
140 concentrations were determined using a Qubit 3 fluorometer (Invitrogen, Carlsbad, CA, USA).

141 After extraction, DNA concentrations were adjusted to 25 ng/μl and sent to the ISU DNA  
142 facility for sequencing using the Illumina MiSeq platform (Illumina, San Diego, CA, USA).  
143 Briefly, the genomic DNA from each sample was amplified using Platinum™ Taq DNA  
144 Polymerase (Thermo Fisher Scientific, Waltham, MA, USA) with one replicate per sample using  
145 universal 16S rRNA gene bacterial primers [515F (5'-GTGYCAGCMGCCGCGGTAA-3'; [26])  
146 and 806R (5'-GGACTACNVGGGTWTCTAAT-3'; [27])] amplifying the variable region V4, as  
147 previously described [28]. All samples underwent PCR with an initial denaturation step at 94°C  
148 for 3 min, followed by 45 seconds of denaturing at 94°C, 20 seconds of annealing at 50°C, and 90  
149 seconds of extension at 72°C. This was repeated for 35 total PCR cycles and finished with a 10  
150 minute extension at 72°C. All the PCR products were then purified with the QIAquick 96 PCR  
151 Purification Kit (Qiagen, Hilden, Germany) according to the manufacturer's instructions. PCR bar-  
152 coded amplicons were mixed at equal molar ratios and used for Illumina MiSeq paired-end  
153 sequencing with 150 bp read length and cluster generation with 10% PhiX control DNA on an  
154 Illumina MiSeq platform at the ISU DNA facility.

155

## 156 **Sequence analysis**

157           Sequence analysis was done with Mothur V1.40.5 following the Mothur MiSeq Standard  
158 Operating Procedure [28]. Barcode sequences, primers and low-quality sequences were trimmed  
159 using a minimum average quality score of 35, with a sliding window size of 50 bp. Chimeric  
160 sequences were removed with the “Chimera.uchime” command. For alignment and taxonomic  
161 classification of operational taxonomic units (OTUs), the SILVA SSU NR reference database  
162 (V132) provided by the mothur website was used. Sequences were clustered into OTUs with a  
163 cutoff of 99% 16S rRNA gene similarity (=0.01 distance). As stated above, due to the clear  
164 difference between rumen content and rumen epithelial microbial communities, rumen content  
165 samples were analyzed separately from the rumen epithelial samples.

166           To compare alpha diversity between experimental groups, reads were randomly  
167 subsampled to accommodate the sample with the lowest number of reads across data sets (20,000  
168 sequences for rumen content samples and 20,000 sequences for rumen epithelial samples).  
169 Measurements of Chao species richness, Shannon Diversity, and Simpson evenness were taken to  
170 compare community structures between experimental groups. The means of the experimental  
171 group alpha diversity measures were compared using a pooled t-test assuming equal variance.  
172 Because the analysis compared cattle rumen samples of the same type (rumen content/rumen  
173 content or rumen epithelial/rumen epithelial) and because animals of the same group at the same  
174 farm, the samples were assumed to be highly similar in nature. Therefore, Bray-Curtis was selected  
175 as the dissimilarity coefficient because of its ability to compare closely related samples. After  
176 dissimilarity coefficients were assigned to each sample, experimental groups were compared using  
177 the analysis of similarity (ANOSIM) package provided by mothur.



178 All plotting was completed using ggplot2, v2\_3.1.1 graphing package [29, 30] in R 3.6.0.  
179 Overall variation in bacterial communities was visualized using principle coordinate analysis  
180 (PCoA). Canonical correlation analysis (CCA) was used to visualize the variation strictly due to  
181 Sucram<sup>®</sup>. This information was generated with the Phyloseq (v1.28.0 [31]) and Vegan (v2.5-5,  
182 [32]) packages using the shared and taxonomy file generated in mothur. Sequences were randomly  
183 subsampled to 20,000 sequences and Bray-Curtis dissimilarity measures were used to generate  
184 distances between samples for the PCoA and CCA plots.

185 Differences in individual OTUs were compared using Linear Discriminant Analysis (LDA)  
186 Effect Size (LEfSe, [33]), identifying OTUs that most likely explain the greatest between-group  
187 variation. LEfSe performs a Kruskal-Wallis test to analyze all OTUs, broadly selecting OTUs that  
188 show the most variation between sample types. The retained features then undergo a pairwise  
189 Wilcoxon test, removing any OTUs that do not differ in ranking. In the last step, a linear  
190 discriminant analysis model is built from the retained OTUs to determine the effect sizes for each  
191 feature. P-values of <0.05 were considered significant.

192

### 193 **Predictions of microbial functional potential based on a rumen genome collection**

194 We combined assembled draft genomes of rumen content organisms from three studies that used  
195 both metagenome shotgun sequencing data[34], as well as whole genome sequencing of cultured  
196 organisms [35] to create a rumen genome collection (RGC). We then compared the representative  
197 16S rRNA gene sequences from the 100 most abundant OTUs in both the rumen content and rumen  
198 epithelium datasets generated in this study to the RGC using BLAST+ [36], with a threshold of  
199 97% sequence similarity. The taxonomic information from the RGC for each match was then

200 appended to the taxonomic information provided by Silva and NCBI Blast. This was done to offer  
201 additional, possibly more accurate taxonomic classification for these sequences, as well as provide  
202 some information about the possible genetic potential of these OTUs. The genomes from the RGC  
203 that matched the 16S rRNA gene sequences of the significant OTUs were then uploaded into  
204 PATRIC (v3.6.3 [37]) and annotated. The genetic features of each genome identified in the  
205 annotation were then mined for genes involved in feed efficiency and the degradation of saccharin  
206 based on the work done by Shabat et al [38] and Deng et al [39]. Although the genes involved in  
207 degradation of saccharin are not known, Deng et al predicted genes within the aromatic  
208 hydrocarbon degradation and dissimilatory sulfate and sulfide oxidation pathways to be important  
209 for saccharin degradation (Supplementary Table S2).

210

## 211 **Data availability**

212 The 16S rRNA gene sequences have been submitted to the NCBI Sequence Read Archive SRA  
213 and are available under the BioProject ID PRJNA554894.

214

## 215 **Results**

### 216 **Rumen content microbial communities**

217 3,291 OTUs were generated from rumen content samples after quality control and removal  
218 of OTUs representing less than 10 sequences from the 910,228 high quality sequences from 10  
219 samples. The average sequencing depth per sample was 91,022 sequences with a standard  
220 deviation of 32,011 sequences. 99.5% of the reads were bacterial and 0.5% were archaeal. The  
221 3,291 OTUs were assigned to 20 phyla with *Bacteroidetes*, *Proteobacteria* and *Firmicutes* being

222 the most abundant: representing 39%, 30% and 20% of all reads, respectively (Fig. 1). Within the  
223 rumen content OTUs, OTU 1, classified as *Ruminobacter* RUG14687 with 100% sequence  
224 similarity using the RGC and *Succinivibrionaceae*\_UCG-001 (88.98% sequence similarity, Silva  
225 v132), was the most abundant and accounted for 25.6% of all reads and had a 100% sequence  
226 similarity with OTU 1 of the rumen epithelium dataset. Among the 50 most abundant rumen  
227 content OTUs, 27 OTUs were classified within the family *Prevotellaceae*, a family which  
228 accounted for 32% of all reads from the rumen content data set. A list of the 50 most abundant  
229 rumen content OTUs can be found in Supplementary Table S3. Highly abundant genera within the  
230 rumen content include: *Succinivibrionaceae*\_UCG-001 (25.6%), *Prevotella*\_1 (18.3%),  
231 *Treponema*\_2 (3.3%), *Rikenella* (2.1%) and *Fibrobacter* (1.8%) (Fig. 2).

232

233 **Fig. 1. Relative abundance of rumen content (A) and rumen epithelium (B) microbial**  
234 **communities on phylum level in response to Sucram<sup>®</sup> addition.** Data are shown for baseline  
235 (before) and after 28 days of Sucram<sup>®</sup> addition to the diet. Only the 10 most abundant phyla per  
236 experimental group are shown.

237

238 **Fig. 2. Relative abundance of rumen content (A) and rumen epithelium (B) microbial**  
239 **communities on genus level in response to Sucram<sup>®</sup> addition.** Data are shown for baseline  
240 (before) and after 28 days of Sucram<sup>®</sup> addition to the diet. Only the 10 most abundant genera per  
241 experimental group are shown.

242

243 No significant differences were observed in microbial diversity (Shannon,  $P = 0.9$ ), species  
244 richness (Chao,  $P = 0.81$ ) and microbial community evenness (Simpson,  $P = 0.73$ ) when  
245 comparing BL and Sucram<sup>®</sup> rumen content experimental groups (Supplementary Table S4). BL  
246 and Sucram<sup>®</sup> bacterial communities of the rumen content were compared using ANOSIM, and no  
247 significant differences between experimental groups were found ( $p = 0.527$ ,  $R = -0.036$ ). PCoA  
248 plots generated with these data also provided no evidence of community clustering according to  
249 experimental group and 10.5% of the total variation was due to experimental group (CCA, Fig. 3).  
250 The lack of clustering and low amount of variation due to experimental group corroborates the  
251 reported ANOSIM community comparison.

252 Significant differences in abundance of 11 OTUs were identified using LEfSe. However,  
253 out of the 100 most abundant rumen content OTUs, none were found to be significantly different  
254 in abundance between the experimental groups (Supplementary Table S5).

255  
256 **Fig. 3. Beta diversity of rumen microbial communities in response to Sucram<sup>®</sup> addition to**  
257 **the diet.** Principal coordinate analysis of rumen epithelium (A) and rumen content (C) samples.  
258 Canonical coordinate analysis of rumen epithelium (B) and rumen content (D) microbial  
259 communities in response to Sucram<sup>®</sup> addition. Data are shown for baseline (before) and after 28  
260 days of Sucram<sup>®</sup> addition to the diet. All plots are based on Bray Curtis differences.

261

### 262 **Rumen epithelium microbial communities**

263 Overall, 6,511 OTUs were generated after quality control and removal of OTUs  
264 representing less than 10 sequences from the 3.05 million high quality sequences obtained from  
265 30 samples. The average number of sequences per sample was 101,742, with a standard deviation

266 of 18,577 sequences. Most of the reads (97.7%) were bacterial, 2.3% were archaeal. From the  
267 6,511 OTUs, 26 phyla were identified with *Firmicutes*, *Bacteroidetes*, and *Proteobacteria* being  
268 the most abundant: representing 32%, 28%, and 21% of all reads, respectively (Fig. 1). The most  
269 abundant OTU within the epithelial data set was identified as *Ruminobacter* RUG14687 with  
270 100% sequence similarity using the RGC and *Succinivibrionaceae*\_UCG-001 (88.98% sequence  
271 similarity, Silva v132), and accounted for 11.7 % of all reads from the epithelial data set. OTUs 2,  
272 3, 4 and 5 were classified as *Mogibacterium*, *Butyrivibrio*, *Campylobacter* and *Prevotella*,  
273 accounting for 3.0%, 1.7%, 1.7% and 1.4% of all epithelial reads, respectively. A list of the 50  
274 most abundant rumen wall OTUs can be found in Supplementary Table S6. On genus level, the  
275 most abundant genera of the rumen wall dataset include: *Succinivibrionaceae*\_UCG-001 (12%),  
276 *Prevotella\_1* (8.7%), *Butyrivibrio\_2* (6.1%), *Rikenella* (4.2%), *Treponema\_2* (4%), and  
277 *Mogibacterium* (3.7%) (Fig. 2).

278 When comparing BL and Sucram<sup>®</sup> epithelial experimental groups, we observed no  
279 significant differences in diversity (Shannon,  $P = 0.64$ , species richness (Chao,  $P = 0.07$ ) and  
280 community evenness (Simpson,  $P = 0.73$ ) (Supplementary Table S7). Similar to the rumen content  
281 dataset, no significant differences (p-value: 0.2, R-value: 0.025) were detected when comparing  
282 entire bacterial communities of experimental groups using ANOSIM. This result was corroborated  
283 by the lack of apparent clustering of experimental groups seen in the PCoA (Fig. 3). BL and  
284 Sucram<sup>®</sup> samples cluster separately in CCA (Fig. 3); however, only 5.2% of the total variation was  
285 due to experimental group.

286 When comparing individual OTUs using LEfSe, the abundances of 78 OTUs were  
287 significantly different between experimental groups. Among the 100 most abundant OTUs, 20  
288 OTUs were significantly different in abundance abundant between experimental groups, with 10

289 OTUs found to be more abundant in the Sucram<sup>®</sup> experimental group and 10 OTUs that showed  
290 higher abundance in BL samples (Fig. 4, Supplementary Table S8). The 10 OTUs found to be  
291 more abundant in the Sucram<sup>®</sup> experimental group were classified as *Prevotellaceae* (OTUs 5, 11,  
292 14, 33, 38, 80, 94), *Sharpea* (OTU 43) and *Bacteroidales* p-251-o5 (OTU 50, an uncultured  
293 member of the *Bacteroidetes*). The 10 OTUs more abundant in the BL samples were classified as  
294 *Methanomethylophilaceae* (OTU 31, 61, 71), *Methanobrevibacter* (OTU 21), *Desulfobulbus*  
295 (OTU 6, 34), *Rikenellaceae* RC9 gut group (OTU 26), *Treponema* (OTU 44), RBG-16-49-21  
296 (OTU 47, a member of the *Leptospiraceae* family) and *Bacteroidales* F082 (OTU 53, an  
297 uncultured member of the *Bacteroidales*).

298

299 **Fig. 4. Relative abundance of significantly different OTUs between baseline and after 28 days**  
300 **of Sucram<sup>®</sup> supplementation within the rumen epithelium microbial communities.**

301 Significantly different OTUs were identified with LEfSe [33] and p-values lower than 0.05 were  
302 considered significant. Only significant OTUs within the 100 most abundant OTUs are shown.  
303 Error bars represent the standard error of the mean. See Supplementary Table S6 for more details.

304

### 305 **Predictions of functional potential**

306 Based on the 97% sequence similarity threshold mentioned above, 32 of the 100 most  
307 abundant OTUs from the rumen content dataset had matches to sequences within the RGC.  
308 Similarly, 29 of the 100 most abundant OTUs from the rumen epithelium dataset had matches to  
309 sequences within the RGC. The associated taxonomy based on standard BLAST, the Silva  
310 reference database and the information provided in the RGC can be found in Supplementary Tables  
311 S3 and S6.

312 BLASTn comparisons of all the representative sequences for all significantly different  
313 OTUs (LEfSe) between experimental groups, including the significant, lowly abundant OTUs  
314 beyond the 100 most abundant, 4 of 11 significant OTUs from the rumen content dataset and 19  
315 of 78 significant OTUs from the rumen epithelium dataset had highly similar (>97%) matches to  
316 the RGC. Results can be found in Supplementary Tables S5 and S8.

317 Several genes related to feed efficiency were identified in the annotated RGC genomes of  
318 the significant OTUs, however, no clear trend was identified in either the rumen content or rumen  
319 epithelium datasets (Supplementary Figures S1 and S2). Very few of the putative genes for  
320 saccharin degradation that were suggested by Deng et al. [39] were identified in any of the  
321 genomes analyzed, and those that were, were identified within both experimental groups. As  
322 mentioned above, the lack of knowledge pertaining to genes involved in saccharin degradation  
323 makes interpreting this data difficult, but does offer a unique opportunity for future research.

324 Within the rumen content set, genes involved in the lactate production pathway were  
325 identified in organisms belonging to both the Sucram and baseline experimental groups. Genes  
326 involved in propionate, valerate and isovalerate synthesis were only found in the Sucram  
327 experimental group only, however, there was only a single rumen content baseline OTU (717) that  
328 had a match within the RGC. A single gene involved in methanogenesis [E.C. 1.8.98.1] was found  
329 in the genome matching OTU 717 as well, which was more abundant in the baseline experimental  
330 group.

331 Within the rumen epithelium dataset, genes involved in the propionate and lactate  
332 production pathways were identified in organisms belonging to both the Sucram and baseline  
333 experimental groups. The aldehyde dehydrogenase (NAD<sup>+</sup>) [E.C. 1.2.1.3] within the valerate and  
334 isovalerate synthesis pathways was found in genomes related to organisms that were significantly

335 more abundant in the Sucram experimental group. Butyrate kinase [E.C. 2.7.2.7], a key enzyme in  
336 the synthesis of butyrate, was only found in a single genome matching OTU260 that was  
337 significantly more abundant in the baseline experimental group. Genes involved in  
338 methanogenesis were identified in genomes related to OTU21 which was classified as a  
339 *Methanobrevibacter sp.* and was more abundant in the baseline experimental group.

340

## 341 **Discussion**

342 Before discussing the results and implications of this study, we want to highlight some of  
343 the limitations. The main aim of our study was to identify if the presence of Sucram® has an  
344 influence on rumen microbial communities. To ensure the additive was indeed present within the  
345 rumen, Sucram® was administered directly through the fistula. Any sensory stimuli (i.e. taste or  
346 smell) would be limited, as the sweetener was not added to the feed. Thus, as mentioned above,  
347 we did not measure feed intake, average daily gain or milk yield in response to administration of  
348 Sucram® for this study.

349 Despite the limitations, this is the first study to provide insight into the effect of saccharin-  
350 based sweeteners such as Sucram® on rumen microbial communities present within the content as  
351 well as on the rumen epithelium. Until now, the research conducted to identify the effects of  
352 artificial sweeteners on mammalian gastrointestinal tract microbial communities has been  
353 exclusively focused on monogastric animal models such as rats and pigs [4, 7, 40]. For example, a  
354 recent study provided evidence that certain bacteria degrade saccharin-based artificial sweeteners,  
355 indicating artificial sweeteners may not be non-caloric to the host if they are degraded to usable  
356 metabolic products [39]. Other studies focusing on the effect of Sucram® supplementation have



357 reported changes in microbial communities in monogastric livestock. Daly *et al.* reported that  
358 Sucram<sup>®</sup> alters the abundance of several bacterial phylotypes in porcine intestinal microbial  
359 communities including *Lactobacillus*, *Ruminococcaceae* and *Veillonellaceae* [41]. Additionally,  
360 Kelly *et al.* provided evidence that the addition of Sucram<sup>®</sup> to the diet led to changes in the  
361 diversity of mucosal bacteria within the small intestine in swine, specifically a decrease in  
362 *Campylobacter coli* and an increase in members of the *Helicobacteraceae* family [3]. Additionally,  
363 a reduction of *Ruminococcus* was documented in a study analyzing the effect of saccharin on  
364 inflammatory molecules and gut dysbiosis in mice [40]. Although no significant differences were  
365 found for OTUs classified as *Lactobacillus*, *Veillonellaceae*, *Campylobacter* or  
366 *Helicobacteraceae*, the study reported in this manuscript observed a significant decrease in  
367 *Ruminococcaceae* (OTU 106) similar to other recent studies in monogastric animals [40, 42]. These  
368 studies and the study reported here demonstrate that Sucram<sup>®</sup> C-150 does have an effect on  
369 mammalian gut microbial populations, but the changes in microbial community structure are  
370 largely distinct between monogastric and ruminant species.

371 In the present report, we show that the addition of Sucram<sup>®</sup> did not induce significant  
372 changes in overall species richness, evenness or diversity (Supplementary Tables S3 and S5), in  
373 either rumen content or rumen epithelial microbial communities. This is somewhat unexpected,  
374 considering the impact Sucram<sup>®</sup> supplementation had on highly abundant phylotypes, especially  
375 the highly abundant OTUs within the rumen epithelium data set (Supplementary Table S6).  
376 Although some members of the microbial communities have increased or decreased considerably  
377 in abundance (i.e. *Prevotellaceae*, *Desulfobulbaceae* and methanogenic archaea), there were no  
378 phylotypes that were completely diminished after the supplementation of Sucram<sup>®</sup>. This suggests  
379 that supplementation of Sucram<sup>®</sup> does not have a major overall impact on the entire rumen

380 microbial ecosystem, and is in contrast to observations reported in some monogastric animal  
381 studies which reported significant community differences in microbial communities due to the  
382 addition of saccharin-based sweeteners [4, 42]. It can be speculated that artificial sweeteners may  
383 specifically influence bacteria that can metabolize saccharin-based artificial sweeteners, which  
384 may also lead to secondary effects on rumen microbiota composition. As mentioned above,  
385 degradation of saccharin has been described for a number of bacteria, but so far, only for those  
386 obtained from environmental, non-animal samples [39]. This would also suggest that ruminant  
387 microbial communities might metabolize these sweeteners differently than monogastric microbial  
388 communities, although this requires verification in future studies.

389 Notably, the inclusion of Sucram<sup>®</sup> affected the microbial populations of the rumen  
390 epithelium more strongly than those of the rumen content (Supplementary Table S6). Because it  
391 is well established that the microbial communities of the rumen content and epithelium are largely  
392 distinct, in both community composition and function, it is reasonable to assume that Sucram<sup>®</sup>  
393 would not necessarily affect both communities to similar degrees and in comparable ways [17, 19,  
394 20, 22, 43, 44]. However, the functional mechanisms behind why the rumen epithelial community  
395 appears more responsive to Sucram<sup>®</sup> supplementation remain unknown. Given the importance of  
396 rumen epithelial microbial communities in key metabolic processes such as nutrient exchange (e.g.  
397 urea, sulfate reduction, and oxygen scavenging) between rumen content and the host animal [23,  
398 45], and the importance of these interactions on the integrity of the rumen epithelium barrier  
399 function, this knowledge gap warrants future study.

400 We used the taxonomy generated based on NCBI BLAST, the Silva reference database and  
401 information provided in the RGC to compare our results with previously published work on related  
402 organisms. The consideration of differences between rumen epithelial experimental groups BL and

403 Sucram<sup>®</sup> with regards to significantly different OTUs may narrow the focus for future research,  
404 providing a list of potentially relevant organisms. Additionally, we can use previous research to  
405 infer possible function of these organisms, leading to potential metabolic markers for future  
406 research as well. However, functional prediction is not experimental proof of these pathways being  
407 expressed, so they should only be considered hypothesis. The comparisons of the OTUs and our  
408 interpretations of these results are listed below.

409 Two OTUs (6 and 34) with reduced abundance found in samples supplemented with  
410 Sucram<sup>®</sup> were classified as potential sulfate-reducing bacteria (SRB) within the *Desulfobulbus*  
411 genus and were related to *Desulfobulbus oligotrophicus* (sequence similarity >97% using NCBI  
412 BLAST [46, 47]. SRB are commonly found within the gastrointestinal tract of ruminants [48] and  
413 particularly at the rumen wall [44, 49] and are known to reduce  $\text{SO}_3^{2-}$  to  $\text{SO}_4^{2-}$  and  $\text{H}_2\text{S}$  [50]. This  
414 leads to the reduction of available metabolic hydrogen generated in cellulose and SCFA  
415 metabolism [47, 51]. Removal of metabolic hydrogen is thought to reduce the synthesis of  
416 methane, reducing the growth potential of methanogenic archaea [47, 50-52]. At the same time,  
417  $\text{H}_2\text{S}$  is considered cytotoxic and linked with inflammation within the intestine [53, 54]. It is  
418 therefore possible that a reduction of SRB could lead to increased methane production due to  
419 reduced competition for hydrogen. As a consequence, this could also result in increased levels of  
420 acetate and lactate, which could be used for milk production by the ruminant and reducing  
421 inflammation in the rumen and intestinal lining.

422 In addition to the decrease of these potential SRB, a decrease in methanogenic archaea was  
423 also observed. Supplementation of Sucram<sup>®</sup> reduced the abundance of OTUs 21, 31, 61 and 71  
424 which were all classified as potential methane-producing archaea (Figure 4). OTU 21 matched a  
425 genome from the RGC with 100% similarity and as expected, several of the genes involved in

426 methanogenesis were identified. While this finding contradicts the hypothesis that SRBs directly  
427 compete with methanogens as mentioned above, it should be noted that the study by Abram et al  
428 [47] and the present study were conducted in two highly different ecosystems (waste water versus  
429 rumen). Because methane production is energetically costly and therefore reduces feed efficiency  
430 [52, 55-57], this decrease in methanogenic archaeal abundance suggests that a supplementation of  
431 Sucram<sup>®</sup> may confer an overall benefit in feed efficiency to the host. Additionally, reduction in  
432 methanogenic archaea could also reduce the generation and release of methane into the atmosphere  
433 [52].

434 Sucram<sup>®</sup> supplementation also decreased the abundance of OTU 26, which was classified  
435 as a member of the uncultivated *Rikenellaceae\_RC9\_gut\_group* (Figure 4). There is little  
436 information available for members of this family and their possible function in ruminants, although  
437 they have been described in ruminants before [58]. It has been shown that some species that are  
438 closely related to the *Rikenellaceae* family can tolerate bile salts and produce succinate from  
439 glucose metabolism [59], but this may not be the case for the *Rikenellaceae* family specifically.

440 We also found that OTU 44, which was classified as *Treponema*, was significantly  
441 decreased in samples supplemented with Sucram<sup>®</sup>. In previous literature, *Treponema* species have  
442 often been associated with cellulolytic capabilities on the surface of plant material and are known  
443 to contain genes allowing the degradation of pectin, xylan, cellulose and starch [60, 61]. When  
444 grown in co-culture with other cellulose degraders (*Ruminococcus albus* and *Fibrobacter*  
445 *succinogenes*), *Treponema bryantii* produced lactic and succinic acids from the byproducts of  
446 cellulose degradation. However, the *Treponema* OTU found in this study (OTU 44) was <90%  
447 similar to *Treponema bryantii*.

448 The abundance of OTU 106, classified as *Ruminococcus*, was significantly decreased with  
449 the supplementation of Sucram<sup>®</sup>. Members of the genus *Ruminococcus* are well recognized as  
450 cellulose degraders with the ability to produce butyrate from the fermentation of cellulose [62].  
451 *Ruminococcus* is linked to higher residual feed intake, suggesting lower feed efficiency in animals  
452 that harbor these organisms in high abundance [63]. Although such animals may be less feed  
453 efficient, producing butyrate is beneficial for the host as it positively stimulates the immune system  
454 and increases tight junction strength [64]. As a pilot study, this trial did not record feed intake or  
455 milk yield of the cows, so it is impossible to relate the reduction in *Ruminococcus* to feed efficiency  
456 and animal health. Additional research testing the effect of Sucram<sup>®</sup> on *Ruminococcus* species and  
457 how it relates to overall animal efficiency is warranted.

458 In contrast to the decrease of different phylotypes, Sucram<sup>®</sup> supplementation led to an  
459 increase in abundance of several rumen epithelium OTUs classified as bacteria known to aid in  
460 digestibility. Several OTUs which were identified as potentially hemicellulolytic and proteolytic  
461 (*Prevotella*, OTUs 5, 11, 14, 33, and 38) were found to be in higher abundance in samples  
462 supplemented with Sucram<sup>®</sup> in comparison to baseline samples. Additionally, some OTUs were  
463 related to bacteria known to produce SCFAs such as lactate, acetate, succinate and propionate  
464 (*Sharpea* and *Prevotella*, OTUs 3, 11, 14, 33, 38 and 43) [65-67]. This suggests that cattle exposed  
465 to Sucram<sup>®</sup> may be more efficiently degrading non-cellulose substrates, thereby potentially  
466 increasing concentrations of certain SCFAs.

467 *Prevotella* is often considered the most abundant bacterial genus in ruminants [14, 68].  
468 Indeed, *Prevotella* was the most abundant genus in both the rumen content and rumen wall  
469 datasets. *Prevotella* species are often associated with plant-rich diets, and they are known to  
470 produce a variety of SCFAs such as acetate, succinate, propionate, and valerate which are absorbed

471 and utilized by the host animal [69]. Three OTUs (5, 33 and 161) identified as *Prevotella* with  
472 differing abundances between experimental groups were matched with the RGC, and genes related  
473 to propionate (OTUs 5 and 33) and lactate (OTU 161) production were identified within the  
474 matching genomes. Furthermore, cattle with greater abundance of *Prevotella* had lower residual  
475 feed intake and higher feed efficiency [63]. Finally, the abundance of *Prevotella* has been  
476 demonstrated to increase in goats fed higher levels of concentrate, a finding likely attributable to  
477 *Prevotella* species' ability to utilize starch for energy production [70]. In the present study, it may  
478 be the case that *Prevotella* was capable of harnessing Sucram<sup>®</sup> as an energy source, thereby  
479 promoting its growth. This warrants future research investigating the effect of Sucram<sup>®</sup> on  
480 *Prevotella* species in regards to feed efficiency.

481 In this study, many highly abundant OTUs classified within the genus *Prevotella*, as well  
482 as OTU 43 (classified as *Sharpea azabuensis*) were found to be in higher abundance in Sucram<sup>®</sup>-  
483 supplemented samples (Figure 4). As previously stated, both *Prevotella* and *Sharpea* are known  
484 SCFA producers. A recent amplicon sequencing study established a link between lactate-  
485 producing bacteria, *Sharpea azabuensis*, and succinate and propionate-producing bacteria  
486 *Prevotella bryantii* where it was discovered sheep with lower methane emissions had a higher  
487 abundance of *Sharpea* and *Prevotella*. [56]. A follow-up study compared the metagenomes and  
488 metatranscriptomes of rumen microbiota from sheep with either high or low methane yields,  
489 further demonstrating that *Sharpea* reduces available metabolic hydrogen during SCFA synthesis  
490 thereby reducing methane production, resulting in a higher feed efficiency [57]. This can be  
491 connected to saccharin-based sweeteners such as Sucram<sup>®</sup> through work by Suez et al, who  
492 identified increased expression of genes in glycogen degradation leading to increased production  
493 of propionate and acetate in rodents fed saccharin sweeteners [4]. Additionally, the inclusion of

494 Sucram<sup>®</sup> was shown to increase levels of lactate in the gastrointestinal lumen of pigs [41]. Bacteria  
495 producing SCFAs are in direct competition with methanogenic archaea [51, 52, 71], which could  
496 explain the reduction in methanogen abundance observed in this study. It can be hypothesized that  
497 Sucram<sup>®</sup> might be able to modify the composition of the rumen microbiota in a way that decreases  
498 methane production by promoting growth SCFA producing bacteria, leading to an increase in  
499 livestock feed efficiency and productivity.

500 Additionally, to identify genes that may have implications on feed efficiency which  
501 Sucram<sup>®</sup> differentially influences, we mined known rumen genomes that matched some of the 16S  
502 rRNA genes from this study with more than 97% sequence similarity for genes that may have  
503 implications on both feed efficiency and saccharin degradation. 36% and 24% of all significant  
504 OTUs for the rumen content and rumen epithelium respectively, had 16S rRNA gene sequences  
505 matches to the RGC. The results of this analytical method did offer additional supportive  
506 information for statements made above, such as confirming the presence of genes involved in  
507 lactate and propionate production in *Sharpea azabuensis* and *Prevotella* sp. genomes, genes  
508 involved in methane production in *Methanobrevibacter* sp. genomes, etc. It also provided  
509 potentially new implications for future research, such as implicating *Sharpea azabuensis* possible  
510 involvement in valerate and isovalerate production. Finally, it may offer functional predictions for  
511 previously uncultured organisms important to this study by matching 16S rRNA genes with rumen  
512 reference genomes assembled in a number of recent studies [34, 35].

513 Comparisons of OTUs using the RGC as a reference are a prediction of genetic potential.  
514 Using these predictions to suggest function should only be viewed as a hypothesis until  
515 experimentally tested. However, as seen in [72, 73], genomic prediction based on 16S rRNA gene  
516 sequence similarity can be useful in identifying gene or metabolic targets in future studies. And,

517 as the research into rumen bacterial communities and their function progresses, the usefulness of  
518 such habitat-specific reference databases such as the RGC should increase. Identifying and  
519 including genes important in cellulose degradation, SCFA synthesis, vitamin synthesis, nitrogen  
520 cycling, and other metabolically important processes for ruminants would improve predictions of  
521 genomic potential and detection of pathways relevant to the experimental treatment. Genes  
522 involved in saccharin degradation and utilization are wholly absent from the literature as well,  
523 which could have implications on animal health and performance.

524

## 525 **Conclusion**

526 This pilot study demonstrated that the rumen microbial community remains largely stable  
527 in response to the inclusion of Sucram<sup>®</sup>, with only a few significant changes in abundance of  
528 certain microbial phylotypes. A prediction of the important phylotypes' genetic potential identified  
529 the presence of key genes related to feed efficiency. The differences observed in response to  
530 Sucram<sup>®</sup> supplementation were most profound in the rumen epithelial microbial communities,  
531 which could have important implications for the integrity of the rumen epithelium to serve as a  
532 barrier preventing inflammation and infiltration of pathogens. OTUs decreased after Sucram<sup>®</sup>  
533 supplementation were linked to methane production and reduced feed efficiency, whereas OTUs  
534 increased following Sucram<sup>®</sup> supplementation were associated with propionate and lactate  
535 production potential and increased feed efficiency. Therefore, supplementation with Sucram<sup>®</sup> may  
536 foster a microbial community that decreases available metabolic hydrogen for methane generation  
537 and produces SCFAs important for ruminant performance. This in turn may lead to more efficient  
538 ruminant livestock with lower methane emission. However, we also want to highlight the  
539 preliminary nature of the current pilot study and the need for future validations of our findings. In



540 conclusion, this pilot study suggests that the supplementation of saccharin-based sweeteners such  
541 as Sucram<sup>®</sup> causes novel and potentially beneficial effects on ruminant health and performance  
542 other than increased palatability, possibly driven by changes in the rumen microbiota especially  
543 the microbial communities of the lesser-studied rumen epithelium.

544

#### 545 **Acknowledgements**

546 We would like to acknowledge Dr. Alexandra Blanchard, Pancosma S.A./ADM Group, Rolle,  
547 Switzerland, for critically reading the manuscript.

548

#### 549 **References**

- 550 1. McMeniman JP, Rivera JD, Schlegel P, Rounds W, Galyean ML. Effects of an artificial  
551 sweetener on health, performance, and dietary preference of feedlot cattle. *J Anim Sci.*  
552 2006;84(9):2491-500. Epub 2006/08/16. doi: 10.2527/jas.2006-098. PubMed PMID: 16908654.
- 553 2. Ponce CH, Brown MS, Silva JS, Schlegel P, Rounds W, Hallford DM. Effects of a  
554 dietary sweetener on growth performance and health of stressed beef calves and on diet  
555 digestibility and plasma and urinary metabolite concentrations of healthy calves. *J Anim Sci.*  
556 2014;92(4):1630-8. Epub 2014/03/26. doi: 10.2527/jas.2013-6795. PubMed PMID: 24663208.
- 557 3. Kelly J, Daly K, Moran AW, Ryan S, Bravo D, Shirazi-Beechey SP. Composition and  
558 diversity of mucosa-associated microbiota along the entire length of the pig gastrointestinal tract;  
559 dietary influences. *Environ Microbiol.* 2017;19(4):1425-38. Epub 2016/11/22. doi:  
560 10.1111/1462-2920.13619. PubMed PMID: 27871148.

- 561 4. Suez J, Korem T, Zeevi D, Zilberman-Schapira G, Thaïss CA, Maza O, et al. Artificial  
562 sweeteners induce glucose intolerance by altering the gut microbiota. *Nature*.  
563 2014;514(7521):181-6. Epub 2014/09/19. doi: 10.1038/nature13793. PubMed PMID: 25231862.
- 564 5. Suez J, Korem T, Zilberman-Schapira G, Segal E, Elinav E. Non-caloric artificial  
565 sweeteners and the microbiome: findings and challenges. *Gut Microbes*. 2015;6(2):149-55. Epub  
566 2015/04/02. doi: 10.1080/19490976.2015.1017700. PubMed PMID: 25831243; PubMed Central  
567 PMCID: PMC4615743.
- 568 6. Abou-Donia MB, El-Masry EM, Abdel-Rahman AA, McLendon RE, Schiffman SS.  
569 Splenda alters gut microflora and increases intestinal p-glycoprotein and cytochrome p-450 in  
570 male rats. *J Toxicol Environ Health A*. 2008;71(21):1415-29. Epub 2008/09/19. doi:  
571 10.1080/15287390802328630. PubMed PMID: 18800291.
- 572 7. Anderson RL, Kirkland JJ. The effect of sodium saccharin in the diet on caecal  
573 microflora. *Food Cosmet Toxicol*. 1980;18(4):353-5. Epub 1980/08/01. PubMed PMID:  
574 7007181.
- 575 8. Frankenfeld CL, Sikaroodi M, Lamb E, Shoemaker S, Gillevet PM. High-intensity  
576 sweetener consumption and gut microbiome content and predicted gene function in a cross-  
577 sectional study of adults in the United States. *Ann Epidemiol*. 2015;25(10):736-42 e4. Epub  
578 2015/08/15. doi: 10.1016/j.annepidem.2015.06.083. PubMed PMID: 26272781.
- 579 9. Ruiz-Ojeda FJ, Plaza-Diaz J, Saez-Lara MJ, Gil A. Effects of Sweeteners on the Gut  
580 Microbiota: A Review of Experimental Studies and Clinical Trials. *Adv Nutr*.  
581 2019;10(suppl\_1):S31-S48. Epub 2019/02/06. doi: 10.1093/advances/nmy037. PubMed PMID:  
582 30721958; PubMed Central PMCID: PMC6363527.

- 583 10. Bokulich NA, Blaser MJ. A bitter aftertaste: unintended effects of artificial sweeteners on  
584 the gut microbiome. *Cell Metab.* 2014;20(5):701-3. Epub 2014/12/03. doi:  
585 10.1016/j.cmet.2014.10.012. PubMed PMID: 25440050; PubMed Central PMCID:  
586 PMCPMC4494042.
- 587 11. Labrecque MT, Malone D, Caldwell KE, Allan AM. Impact of Ethanol and Saccharin on  
588 Fecal Microbiome in Pregnant and Non-Pregnant Mice. *J Pregnancy Child Health.* 2015;2(5).  
589 Epub 2016/03/19. doi: 10.4172/2376-127X.1000193. PubMed PMID: 26989786; PubMed  
590 Central PMCID: PMCPMC4792281.
- 591 12. Paz HA, Hales KE, Wells JE, Kuehn LA, Freetly HC, Berry ED, et al. Rumen bacterial  
592 community structure impacts feed efficiency in beef cattle. *J Anim Sci.* 2018;96(3):1045-58.  
593 Epub 2018/04/05. doi: 10.1093/jas/skx081. PubMed PMID: 29617864; PubMed Central  
594 PMCID: PMCPMC6093515.
- 595 13. Krause DO, Denman SE, Mackie RI, Morrison M, Rae AL, Attwood GT, et al.  
596 Opportunities to improve fiber degradation in the rumen: microbiology, ecology, and genomics.  
597 *FEMS Microbiol Rev.* 2003;27(5):663-93. Epub 2003/11/26. doi: 10.1016/S0168-  
598 6445(03)00072-X. PubMed PMID: 14638418.
- 599 14. Bekele AZ, Koike S, Kobayashi Y. Genetic diversity and diet specificity of ruminal  
600 *Prevotella* revealed by 16S rRNA gene-based analysis. *FEMS Microbiology Letters.*  
601 2010;305(1):49-57. doi: 10.1111/j.1574-6968.2010.01911.x.
- 602 15. Plaizier JC, Krause DO, Gozho GN, McBride BW. Subacute ruminal acidosis in dairy  
603 cows: The physiological causes, incidence and consequences. *VET J.* 2008;176(1):21-31. doi:  
604 <https://doi.org/10.1016/j.tvjl.2007.12.016>.

- 605 16. Steele MA, Croom J, Kahler M, AlZahal O, Hook SE, Plaizier K, et al. Bovine rumen  
606 epithelium undergoes rapid structural adaptations during grain-induced subacute ruminal  
607 acidosis. *Am J Physiol Regul Integr Comp Physiol*. 2011;300(6):R1515-R23. doi:  
608 10.1152/ajpregu.00120.2010. PubMed PMID: 21451145.
- 609 17. Liu JH, Zhang ML, Zhang RY, Zhu WY, Mao SY. Comparative studies of the  
610 composition of bacterial microbiota associated with the ruminal content, ruminal epithelium and  
611 in the faeces of lactating dairy cows. *Microb Biotechnol*. 2016;9(2):257-68. Epub 2016/02/03.  
612 doi: 10.1111/1751-7915.12345. PubMed PMID: 26833450; PubMed Central PMCID:  
613 PMC4767291.
- 614 18. Tamate H, Kikuchi T, Onodera A, Nagatani T. Scanning electron microscopic  
615 observation on the surface structure of the bovine rumen mucosa. *Arch Histol Jpn*.  
616 1971;33(4):273-82. Epub 1971/10/01. PubMed PMID: 5168659.
- 617 19. McCowan RP, Cheng KJ, Bailey CB, Costerton JW. Adhesion of bacteria to epithelial  
618 cell surfaces within the reticulo-rumen of cattle. *Appl Environ Microbiol*. 1978;35(1):149-55.  
619 Epub 1978/01/01. PubMed PMID: 623459; PubMed Central PMCID: PMC242795.
- 620 20. Cheng KJ, McCowan RP, Costerton JW. Adherent epithelial bacteria in ruminants and  
621 their roles in digestive tract function. *Am J Clin Nutr*. 1979;32(1):139-48. Epub 1979/01/01. doi:  
622 10.1093/ajcn/32.1.139. PubMed PMID: 367141.
- 623 21. Chen Y, Penner GB, Li M, Oba M, Guan LL. Changes in bacterial diversity associated  
624 with epithelial tissue in the beef cow rumen during the transition to a high-grain diet. *Appl*  
625 *Environ Microbiol*. 2011;77(16):5770-81. Epub 2011/06/28. doi: 10.1128/AEM.00375-11.  
626 PubMed PMID: 21705529; PubMed Central PMCID: PMC3165274.

- 627 22. Chen Y, Oba M, Guan LL. Variation of bacterial communities and expression of Toll-  
628 like receptor genes in the rumen of steers differing in susceptibility to subacute ruminal acidosis.  
629 Vet Microbiol. 2012;159(3-4):451-9. Epub 2012/05/25. doi: 10.1016/j.vetmic.2012.04.032.  
630 PubMed PMID: 22622335.
- 631 23. Mann E, Wetzels SU, Wagner M, Zebeli Q, Schmitz-Esser S. Metatranscriptome  
632 Sequencing Reveals Insights into the Gene Expression and Functional Potential of Rumen Wall  
633 Bacteria. Front Microbiol. 2018;9:43-. doi: 10.3389/fmicb.2018.00043. PubMed PMID:  
634 29410661.
- 635 24. Bryant MP. Bacterial species of the rumen. Bacteriol Rev. 1959;23(3):125-53. Epub  
636 1959/09/01. PubMed PMID: 13805451; PubMed Central PMCID: PMC181027.
- 637 25. White BA, Lamed R, Bayer EA, Flint HJ. Biomass Utilization by Gut Microbiomes.  
638 Annu. Rev. Microbiol. 2014;68(1):279-96. doi: 10.1146/annurev-micro-092412-155618.  
639 PubMed PMID: 25002092.
- 640 26. Parada AE, Needham DM, Fuhrman JA. Every base matters: assessing small subunit  
641 rRNA primers for marine microbiomes with mock communities, time series and global field  
642 samples. Environ Microbiol. 2016;18(5):1403-14. Epub 2015/08/15. doi: 10.1111/1462-  
643 2920.13023. PubMed PMID: 26271760.
- 644 27. Apprill A, McNally S, Parsons R, Weber L. Minor revision to V4 region SSU rRNA  
645 806R gene primer greatly increases detection of SAR11 bacterioplankton. AQUAT MICROB  
646 ECOL. 2015;75. doi: 10.3354/ame01753.
- 647 28. Kozich JJ, Westcott SL, Baxter NT, Highlander SK, Schloss PD. Development of a dual-  
648 index sequencing strategy and curation pipeline for analyzing amplicon sequence data on the  
649 MiSeq Illumina sequencing platform. Appl Environ Microbiol. 2013;79(17):5112-20. Epub

- 650 2013/06/25. doi: 10.1128/AEM.01043-13. PubMed PMID: 23793624; PubMed Central PMCID:  
651 PMCPMC3753973.
- 652 29. R Core Team. R: A Language and Environment for Statistical Computing. Vienna,  
653 Austria2019.
- 654 30. Wickham H. ggplot2: Elegant Graphics for Data Analysis. Springer-Verlag New York;  
655 2016.
- 656 31. McMurdie PJ, Holmes S. phyloseq: an R package for reproducible interactive analysis  
657 and graphics of microbiome census data. PLoS One. 2013;8(4):e61217. Epub 2013/05/01. doi:  
658 10.1371/journal.pone.0061217. PubMed PMID: 23630581; PubMed Central PMCID:  
659 PMCPMC3632530.
- 660 32. Oksanen J, Blanchet FG, Friendly M, Kindt R, Legendre P, McGlinn D, et al. vegan:  
661 Community Ecology Package. 2019.
- 662 33. Segata N, Izard J, Waldron L, Gevers D, Miropolsky L, Garrett WS, et al. Metagenomic  
663 biomarker discovery and explanation. Genome Biol. 2011;12(6):R60. Epub 2011/06/28. doi:  
664 10.1186/gb-2011-12-6-r60. PubMed PMID: 21702898; PubMed Central PMCID:  
665 PMCPMC3218848.
- 666 34. Stewart RD, Auffret MD, Warr A, Walker AW, Roehe R, Watson M. Compendium of  
667 4,941 rumen metagenome-assembled genomes for rumen microbiome biology and enzyme  
668 discovery. Nat Biotechnol. 2019;37(8):953-61. Epub 2019/08/04. doi: 10.1038/s41587-019-  
669 0202-3. PubMed PMID: 31375809; PubMed Central PMCID: PMCPMC6785717.
- 670 35. Seshadri R, Leahy SC, Attwood GT, Teh KH, Lambie SC, Cookson AL, et al.  
671 Cultivation and sequencing of rumen microbiome members from the Hungate1000 Collection.

- 672 Nat Biotechnol. 2018;36(4):359-67. Epub 2018/03/20. doi: 10.1038/nbt.4110. PubMed PMID:  
673 29553575; PubMed Central PMCID: PMC6118326.
- 674 36. Camacho C, Coulouris G, Avagyan V, Ma N, Papadopoulos J, Bealer K, et al. BLAST+:  
675 architecture and applications. BMC Bioinformatics. 2009;10:421. Epub 2009/12/17. doi:  
676 10.1186/1471-2105-10-421. PubMed PMID: 20003500; PubMed Central PMCID:  
677 PMC6118326.
- 678 37. Wattam AR, Davis JJ, Assaf R, Boisvert S, Brettin T, Bun C, et al. Improvements to  
679 PATRIC, the all-bacterial Bioinformatics Database and Analysis Resource Center. Nucleic Acids  
680 Res. 2017;45(D1):D535-D42. Epub 2016/12/03. doi: 10.1093/nar/gkw1017. PubMed PMID:  
681 27899627; PubMed Central PMCID: PMC5210524.
- 682 38. Shabat SK, Sasson G, Doron-Faigenboim A, Durman T, Yaacoby S, Berg Miller ME, et  
683 al. Specific microbiome-dependent mechanisms underlie the energy harvest efficiency of  
684 ruminants. ISME J. 2016;10(12):2958-72. Epub 2016/05/07. doi: 10.1038/ismej.2016.62.  
685 PubMed PMID: 27152936; PubMed Central PMCID: PMC5148187.
- 686 39. Deng Y, Wang Y, Xia Y, Zhang AN, Zhao Y, Zhang T. Genomic resolution of bacterial  
687 populations in saccharin and cyclamate degradation. Sci Total Environ. 2019;658:357-66. Epub  
688 2018/12/24. doi: 10.1016/j.scitotenv.2018.12.162. PubMed PMID: 30579193.
- 689 40. Bian X, Tu P, Chi L, Gao B, Ru H, Lu K. Saccharin induced liver inflammation in mice  
690 by altering the gut microbiota and its metabolic functions. Food Chem Toxicol. 2017;107(Pt  
691 B):530-9. Epub 2017/05/05. doi: 10.1016/j.fct.2017.04.045. PubMed PMID: 28472674; PubMed  
692 Central PMCID: PMC5647777.
- 693 41. Daly K, Darby AC, Hall N, Wilkinson MC, Pongchaikul P, Bravo D, et al. Bacterial  
694 sensing underlies artificial sweetener-induced growth of gut *Lactobacillus*. Environ Microbiol.

- 695 2016;18(7):2159-71. Epub 2015/06/11. doi: 10.1111/1462-2920.12942. PubMed PMID:  
696 26058469.
- 697 42. Daly K, Darby AC, Hall N, Nau A, Bravo D, Shirazi-Beechey SP. Dietary  
698 supplementation with lactose or artificial sweetener enhances swine gut *Lactobacillus* population  
699 abundance. Br J Nutr. 2014;111 Suppl 1:S30-5. Epub 2014/01/03. doi:  
700 10.1017/S0007114513002274. PubMed PMID: 24382146.
- 701 43. Mead LJ, Jones GA. Isolation and presumptive identification of adherent epithelial  
702 bacteria ("epimural" bacteria) from the ovine rumen wall. Appl Environ Microbiol.  
703 1981;41(4):1020-8. Epub 1981/04/01. PubMed PMID: 7195191; PubMed Central PMCID:  
704 PMCPMC243851.
- 705 44. Mao S, Zhang M, Liu J, Zhu W. Characterising the bacterial microbiota across the  
706 gastrointestinal tracts of dairy cattle: membership and potential function. Scientific reports.  
707 2015;5:16116-. doi: 10.1038/srep16116. PubMed PMID: 26527325.
- 708 45. Jin D, Zhao S, Zheng N, Bu D, Beckers Y, Denman SE, et al. Differences in Ureolytic  
709 Bacterial Composition between the Rumen Digesta and Rumen Wall Based on ureC Gene  
710 Classification. Front Microbiol. 2017;8:385-. doi: 10.3389/fmicb.2017.00385. PubMed PMID:  
711 28326079.
- 712 46. El Houari A, Ranchou-Peyruse M, Ranchou-Peyruse A, Dakdaki A, Guignard M,  
713 Idouhammou L, et al. *Desulfobulbus oligotrophicus* sp. nov., a sulfate-reducing and propionate-  
714 oxidizing bacterium isolated from a municipal anaerobic sewage sludge digester. Int J Syst Evol  
715 Microbiol. 2017;67(2):275-81. Epub 2016/12/03. doi: 10.1099/ijsem.0.001615. PubMed PMID:  
716 27902225.



- 717 47. Abram JW, Nedwell DB. Inhibition of methanogenesis by sulphate reducing bacteria  
718 competing for transferred hydrogen. *Arch Microbiol.* 1978;117(1):89-92. Epub 1978/04/27.  
719 PubMed PMID: 678014.
- 720 48. Coleman GS. A sulphate-reducing bacterium from the sheep rumen. *J Gen Microbiol.*  
721 1960;22:423-36. Epub 1960/04/01. doi: 10.1099/00221287-22-2-423. PubMed PMID:  
722 13811147.
- 723 49. Wetzels SU, Mann E, Metzler-Zebeli BU, Pourazad P, Kumar M, Klevenhusen F, et al.  
724 Epimural Indicator Phylotypes of Transiently-Induced Subacute Ruminant Acidosis in Dairy  
725 Cattle. *Front Microbiol.* 2016;7:274. Epub 2016/03/15. doi: 10.3389/fmicb.2016.00274. PubMed  
726 PMID: 26973642; PubMed Central PMCID: PMC4777738.
- 727 50. Isa Z, Grusenmeyer S, Verstraete W. Sulfate reduction relative to methane production in  
728 high-rate anaerobic digestion: microbiological aspects. *Appl Environ Microbiol.* 1986;51(3):580-  
729 7. Epub 1986/03/01. PubMed PMID: 16347019; PubMed Central PMCID: PMC238922.
- 730 51. Jeyanathan J, Martin C, Morgavi DP. The use of direct-fed microbials for mitigation of  
731 ruminant methane emissions: a review. *Animal.* 2014;8(2):250-61. Epub 2013/11/28. doi:  
732 10.1017/S1751731113002085. PubMed PMID: 24274095.
- 733 52. McAllister TA, Newbold CJ. Redirecting rumen fermentation to reduce methanogenesis.  
734 *Australian Journal of Experimental Agriculture.* 2008;48(2):7-13. doi:  
735 <https://doi.org/10.1071/EA07218>.
- 736 53. Nava GM, Carbonero F, Ou J, Benefiel AC, O'Keefe SJ, Gaskins HR. Hydrogenotrophic  
737 microbiota distinguish native Africans from African and European Americans. *Environ*  
738 *Microbiol Rep.* 2012;4(3):307-15. Epub 2013/06/14. doi: 10.1111/j.1758-2229.2012.00334.x.  
739 PubMed PMID: 23760794; PubMed Central PMCID: PMC4258901.

- 740 54. Loubinoux J, Bronowicki JP, Pereira IA, Mougengel JL, Faou AE. Sulfate-reducing  
741 bacteria in human feces and their association with inflammatory bowel diseases. FEMS  
742 Microbiol Ecol. 2002;40(2):107-12. Epub 2002/05/01. doi: 10.1111/j.1574-  
743 6941.2002.tb00942.x. PubMed PMID: 19709217.
- 744 55. Tapio I, Snelling TJ, Strozzi F, Wallace RJ. The ruminal microbiome associated with  
745 methane emissions from ruminant livestock. J Anim Sci Biotechnol. 2017;8:7. Epub 2017/01/27.  
746 doi: 10.1186/s40104-017-0141-0. PubMed PMID: 28123698; PubMed Central PMCID:  
747 PMCPMC5244708.
- 748 56. Kittelmann S, Pinares-Patino CS, Seedorf H, Kirk MR, Ganesh S, McEwan JC, et al.  
749 Two different bacterial community types are linked with the low-methane emission trait in  
750 sheep. PLoS One. 2014;9(7):e103171. Epub 2014/08/01. doi: 10.1371/journal.pone.0103171.  
751 PubMed PMID: 25078564; PubMed Central PMCID: PMCPMC4117531.
- 752 57. Kamke J, Kittelmann S, Soni P, Li Y, Tavendale M, Ganesh S, et al. Rumen metagenome  
753 and metatranscriptome analyses of low methane yield sheep reveals a *Sharpea*-enriched  
754 microbiome characterised by lactic acid formation and utilisation. Microbiome. 2016;4(1):56.  
755 Epub 2016/10/21. doi: 10.1186/s40168-016-0201-2. PubMed PMID: 27760570; PubMed Central  
756 PMCID: PMCPMC5069950.
- 757 58. Schären M, Drong C, Kiri K, Riede S, Gardener M, Meyer U, et al. Differential effects of  
758 monensin and a blend of essential oils on rumen microbiota composition of transition dairy  
759 cows. Journal of Dairy Science. 2017;100(4):2765-83. doi: [https://doi.org/10.3168/jds.2016-  
760 11994](https://doi.org/10.3168/jds.2016-11994).
- 761 59. Abe K, Ueki A, Ohtaki Y, Kaku N, Watanabe K, Ueki K. *Anaerocella delicata* gen. nov.,  
762 *sp. nov.*, a strictly anaerobic bacterium in the phylum *Bacteroidetes* isolated from a

- 763 methanogenic reactor of cattle farms. *J Gen Appl Microbiol.* 2012;58(6):405-12. doi:  
764 10.2323/jgam.58.405.
- 765 60. Kudo H, Cheng KJ, Costerton JW. Interactions between *Treponema bryantii* and  
766 cellulolytic bacteria in the in vitro degradation of straw cellulose. *Can J Microbiol.*  
767 1987;33(3):244-8. doi: 10.1139/m87-041.
- 768 61. Svartstrom O, Alneberg J, Terrapon N, Lombard V, de Bruijn I, Malmsten J, et al.  
769 Ninety-nine de novo assembled genomes from the moose (*Alces alces*) rumen microbiome  
770 provide new insights into microbial plant biomass degradation. *ISME J.* 2017;11(11):2538-51.  
771 Epub 2017/07/22. doi: 10.1038/ismej.2017.108. PubMed PMID: 28731473; PubMed Central  
772 PMCID: PMC5648042.
- 773 62. Takahashi K, Nishida A, Fujimoto T, Fujii M, Shioya M, Imaeda H, et al. Reduced  
774 Abundance of Butyrate-Producing Bacteria Species in the Fecal Microbial Community in  
775 Crohn's Disease. *Digestion.* 2016;93(1):59-65. doi: 10.1159/000441768.
- 776 63. Li F, Guan LL. Metatranscriptomic Profiling Reveals Linkages between the Active  
777 Rumen Microbiome and Feed Efficiency in Beef Cattle. *Appl Environ Microbiol.* 2017;83(9).  
778 Epub 2017/02/27. doi: 10.1128/AEM.00061-17. PubMed PMID: 28235871; PubMed Central  
779 PMCID: PMC5394315.
- 780 64. Peng L, Li Z-R, Green RS, Holzman IR, Lin J. Butyrate enhances the intestinal barrier by  
781 facilitating tight junction assembly via activation of AMP-activated protein kinase in Caco-2 cell  
782 monolayers. *J Nutr.* 2009;139(9):1619-25. Epub 2009/07/22. doi: 10.3945/jn.109.104638.  
783 PubMed PMID: 19625695.
- 784 65. Kumar S, Treloar BP, Teh KH, McKenzie CM, Henderson G, Attwood GT, et al.  
785 *Sharpea* and *Kandleria* are lactic acid producing rumen bacteria that do not change their

- 786 fermentation products when co-cultured with a methanogen. *Anaerobe*. 2018;54:31-8. Epub  
787 2018/07/29. doi: 10.1016/j.anaerobe.2018.07.008. PubMed PMID: 30055268.
- 788 66. Pybus V, Onderdonk AB. The Effect of pH on Growth and Succinate Production by  
789 *Prevotella bivia*. *Microbial Ecology in Health and Disease*. 1996;9(1):19-25. doi:  
790 10.3109/08910609609167725.
- 791 67. Strobel HJ. Vitamin B12-dependent propionate production by the ruminal bacterium  
792 *Prevotella ruminicola* 23. *Appl Environ Microbiol*. 1992;58(7):2331-3. Epub 1992/07/01.  
793 PubMed PMID: 1637169; PubMed Central PMCID: PMCPMC195777.
- 794 68. Henderson G, Cox F, Ganesh S, Jonker A, Young W, Global Rumen Census C, et al.  
795 Rumen microbial community composition varies with diet and host, but a core microbiome is  
796 found across a wide geographical range. *Sci Rep*. 2015;5:14567. Epub 2015/10/10. doi:  
797 10.1038/srep14567. PubMed PMID: 26449758; PubMed Central PMCID: PMCPMC4598811.
- 798 69. Emerson EL, Weimer PJ. Fermentation of model hemicelluloses by *Prevotella* strains and  
799 *Butyrivibrio fibrisolvens* in pure culture and in ruminal enrichment cultures. *Appl Microbiol*  
800 *Biotechnol*. 2017;101(10):4269-78. Epub 2017/02/10. doi: 10.1007/s00253-017-8150-7. PubMed  
801 PMID: 28180916.
- 802 70. Han X, Li B, Wang X, Chen Y, Yang Y. Effect of dietary concentrate to forage ratios on  
803 ruminal bacterial and anaerobic fungal populations of cashmere goats. *Anaerobe*. 2019;59:118-  
804 25. Epub 2019/06/23. doi: 10.1016/j.anaerobe.2019.06.010. PubMed PMID: 31228671.
- 805 71. Hill J, McSweeney C, Wright AG, Bishop-Hurley G, Kalantar-Zadeh K. Measuring  
806 Methane Production from Ruminants. *Trends Biotechnol*. 2016;34(1):26-35. Epub 2015/11/26.  
807 doi: 10.1016/j.tibtech.2015.10.004. PubMed PMID: 26603286.

- 808 72. Langille MG, Zaneveld J, Caporaso JG, McDonald D, Knights D, Reyes JA, et al.  
809 Predictive functional profiling of microbial communities using 16S rRNA marker gene  
810 sequences. *Nat Biotechnol.* 2013;31(9):814-21. Epub 2013/08/27. doi: 10.1038/nbt.2676.  
811 PubMed PMID: 23975157; PubMed Central PMCID: PMC3819121.
- 812 73. Wilkinson TJ, Huws SA, Edwards JE, Kingston-Smith AH, Siu-Ting K, Hughes M, et al.  
813 CowPI: A Rumen Microbiome Focussed Version of the PICRUSt Functional Inference Software.  
814 *Front Microbiol.* 2018;9:1095. Epub 2018/06/12. doi: 10.3389/fmicb.2018.01095. PubMed  
815 PMID: 29887853; PubMed Central PMCID: PMC5981159.
- 816
- 817

818 **Supporting information captions**

819

820 **Supplementary Table S1:** Dietary composition

821 **Supplementary Table S2:** Genes related to feed efficiency and saccharin degradation. Genes  
822 related to feed efficiency were based on Shabat et al. 2016, genes suggested to be involved in  
823 saccharin degradation are based on Deng et al. 2019.

824 **Supplementary Table S3:** The 50 most abundant OTUs within rumen content samples

825 **Supplementary Table S4:** Chao species richness, Shannon and non-parametric Shannon  
826 Diversity, and Simpson evenness comparisons between Sucram and baseline experimental  
827 groups within the rumen content samples.

828 **Supplementary Table S5:** Significantly different rumen content OTUs between Sucram and  
829 baseline determined with LEfSe.

830 **Supplementary Table S6:** The 50 most abundant OTUs within rumen epithelial samples

831 **Supplementary Table S7:** Chao species richness, Shannon and non-parametric Shannon  
832 Diversity, and Simpson evenness comparisons between Sucram and baseline experimental  
833 groups within the rumen epithelium samples.

834 **Supplementary Table S8:** Significantly different rumen epithelium OTUs between Sucram and  
835 baseline determined with LEfSe.

836 **Supplementary Figure S1.** Predicted genetic potential of rumen content organisms that  
837 significantly differ in abundance between experimental groups, using matching published  
838 genomes.

839 **Supplementary Figure S2.** Predicted genetic potential of rumen epithelium organisms that  
840 significantly differ in abundance between experimental groups, using matching published  
841 genomes.

Figure 1

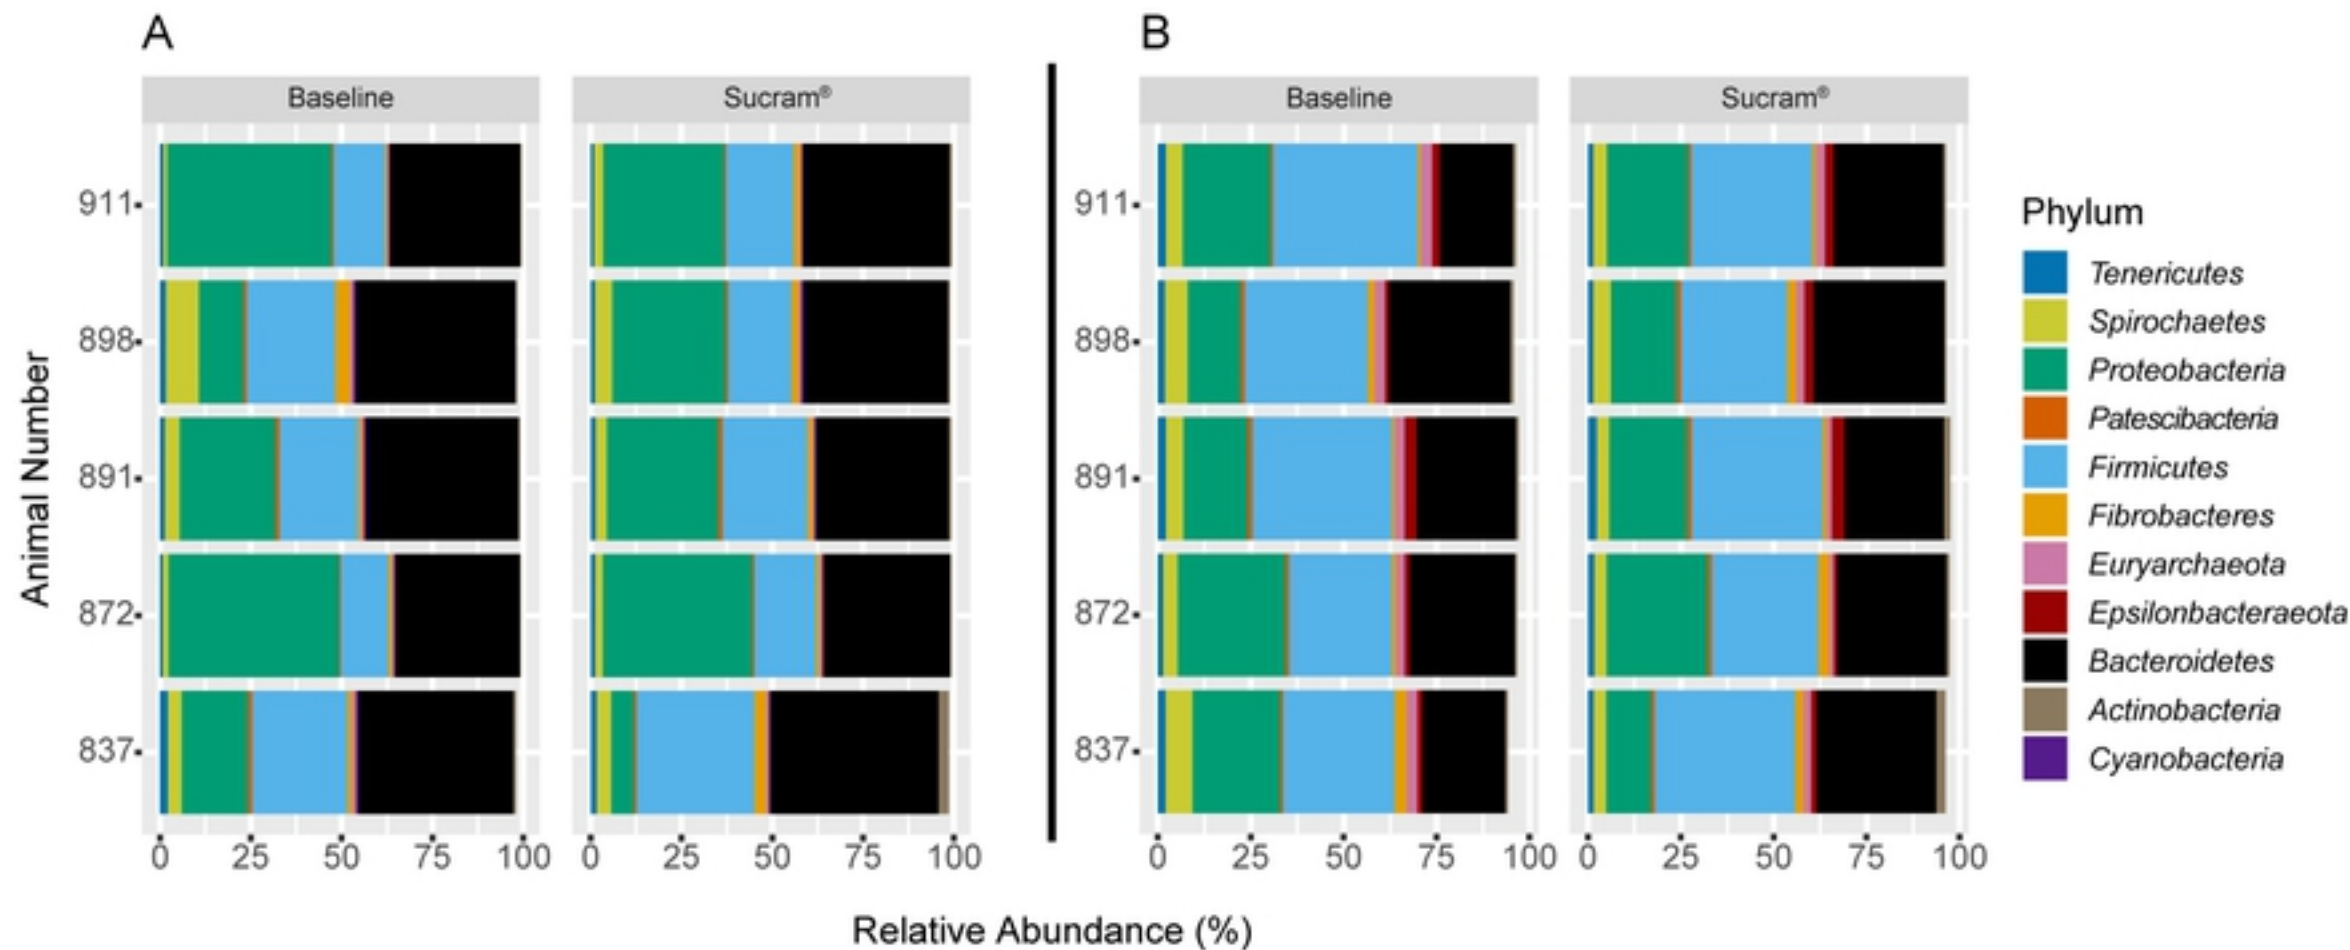

Figure 1



Figure 2

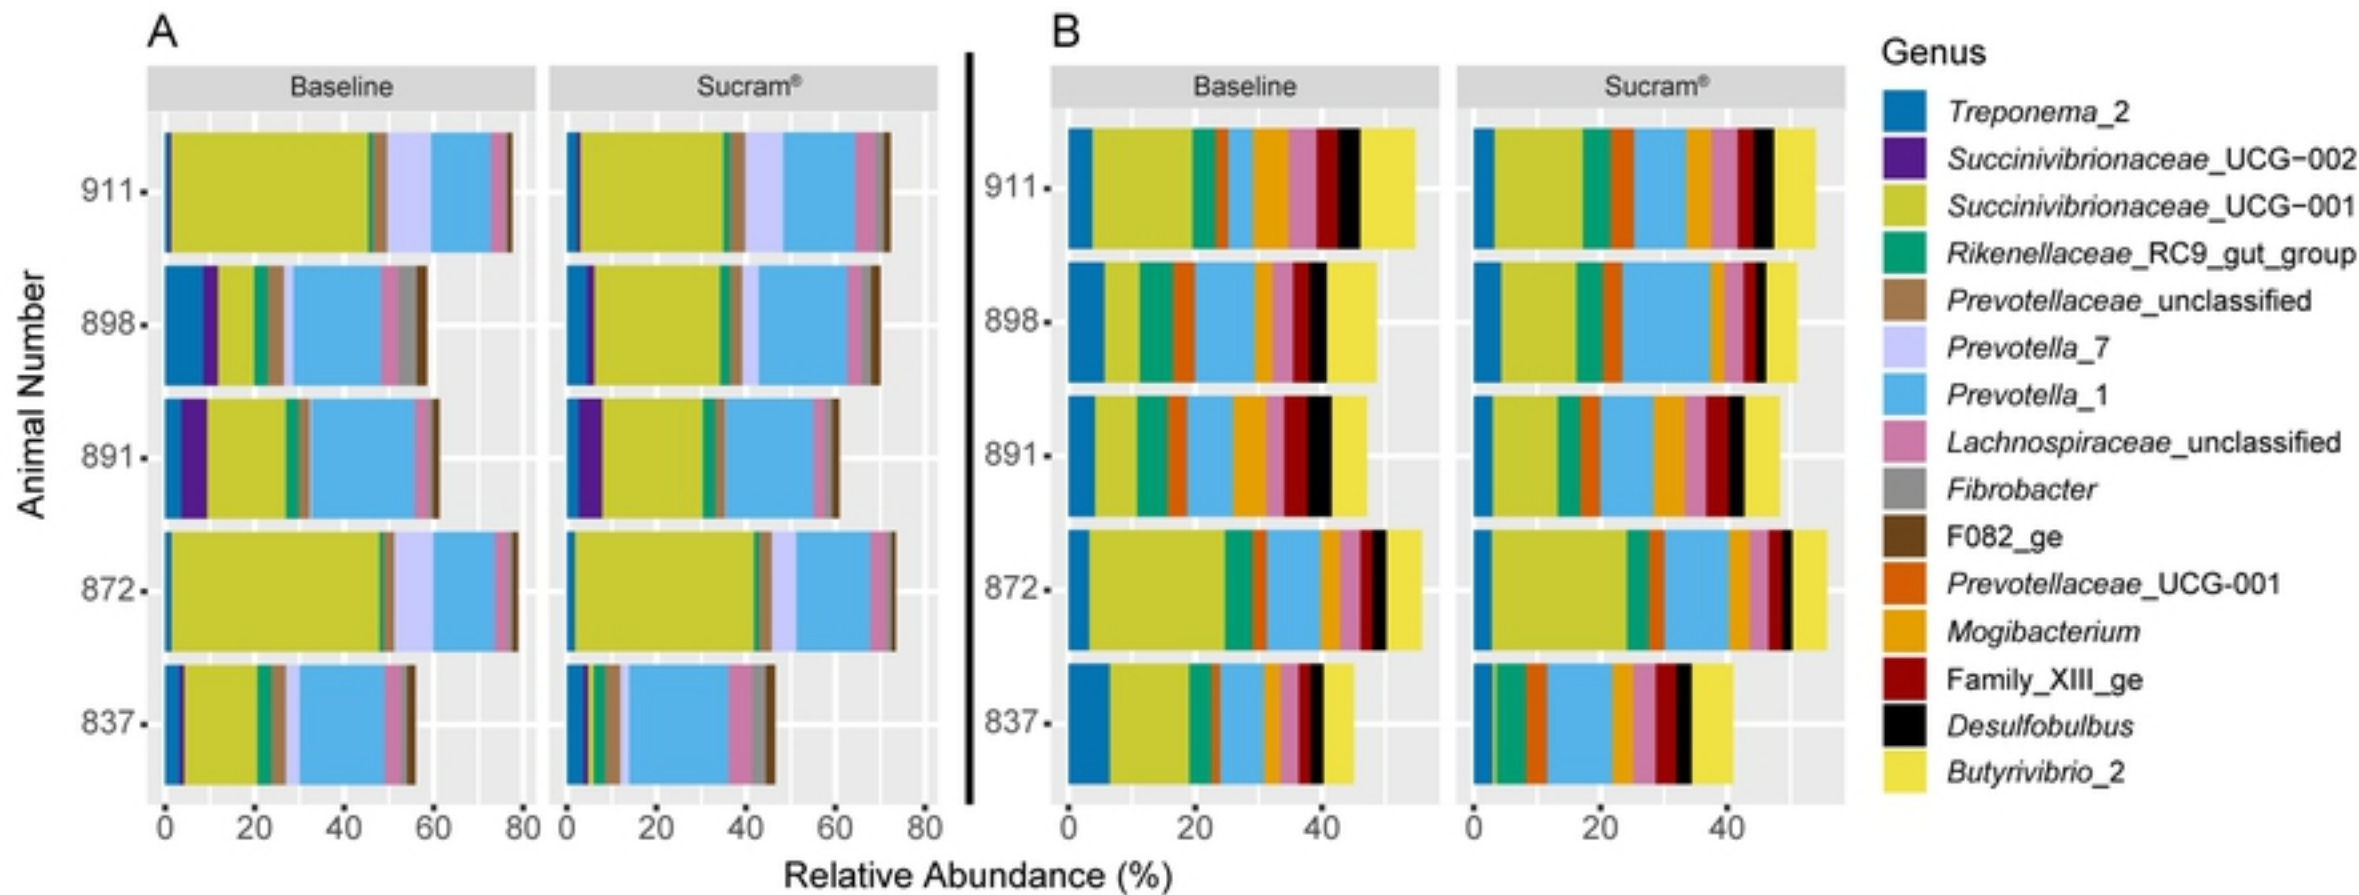

Figure 2

# Figure 3

bioRxiv preprint doi: <https://doi.org/10.1101/2020.05.22.110429>; this version posted May 22, 2020. The copyright holder for this preprint (which was not certified by peer review) is the author/funder, who has granted bioRxiv a license to display the preprint in perpetuity. It is made available under aCC-BY 4.0 International license.

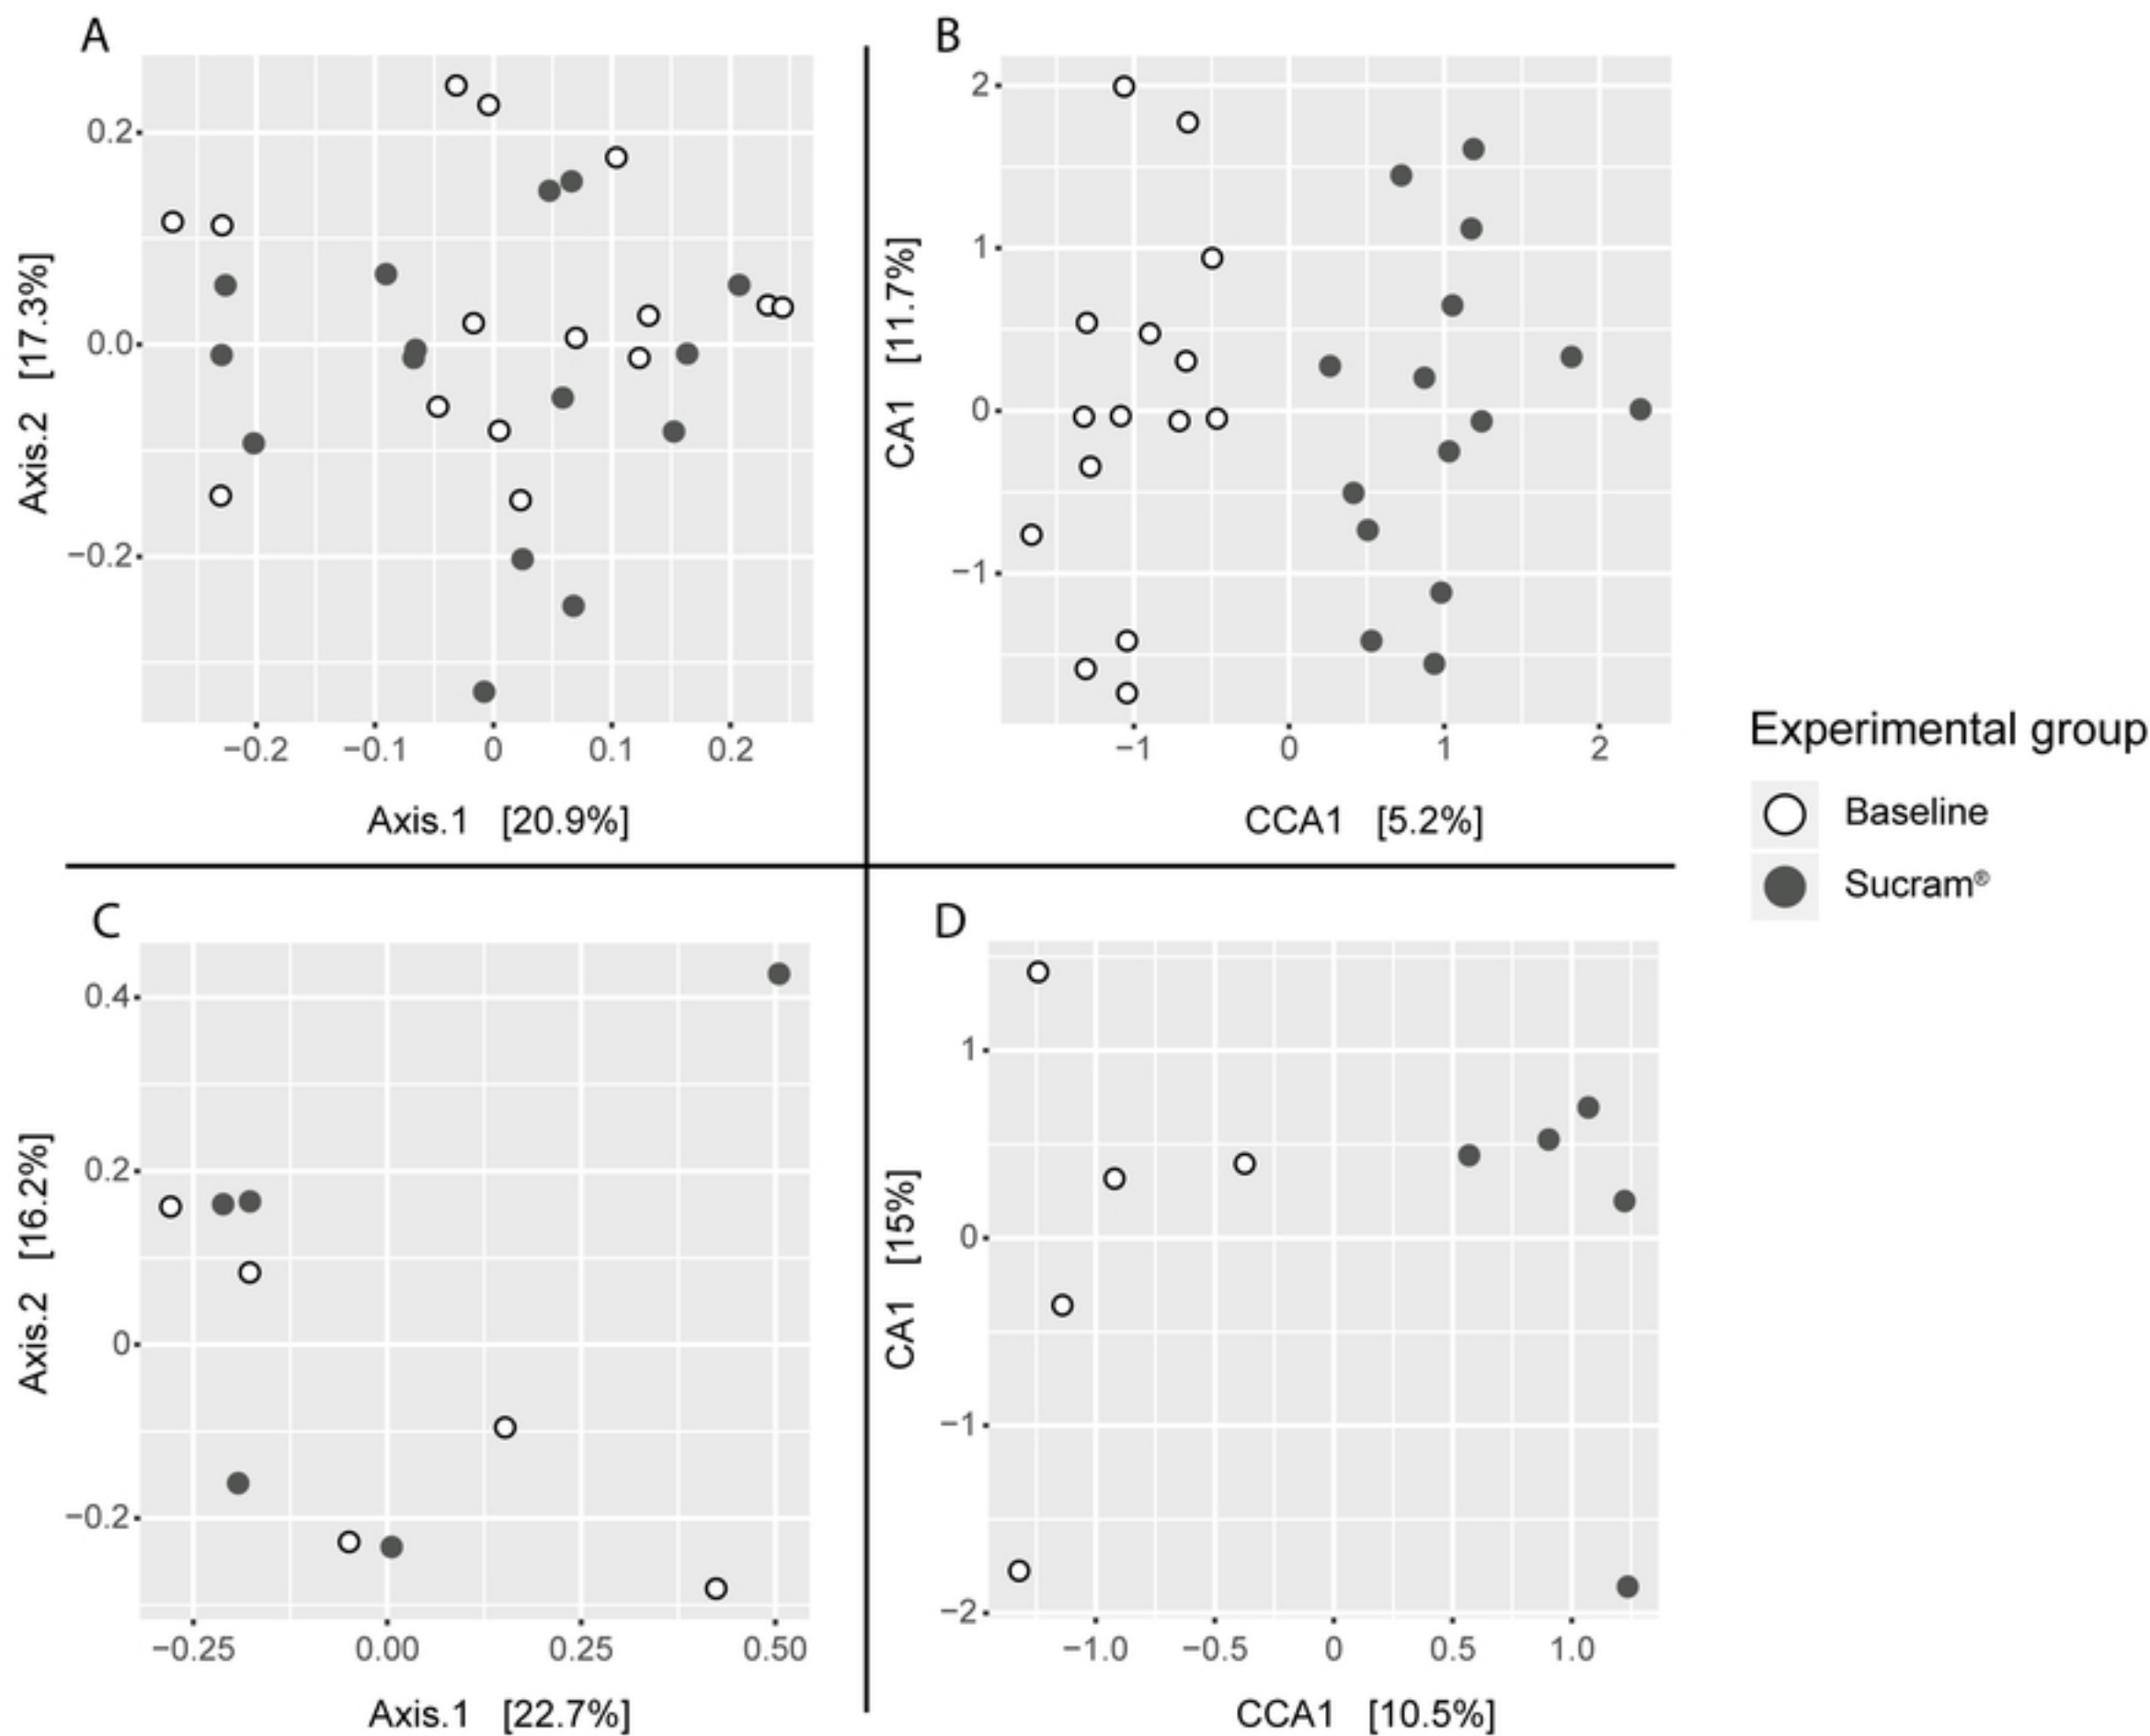

# Figure 3

# Figure 4

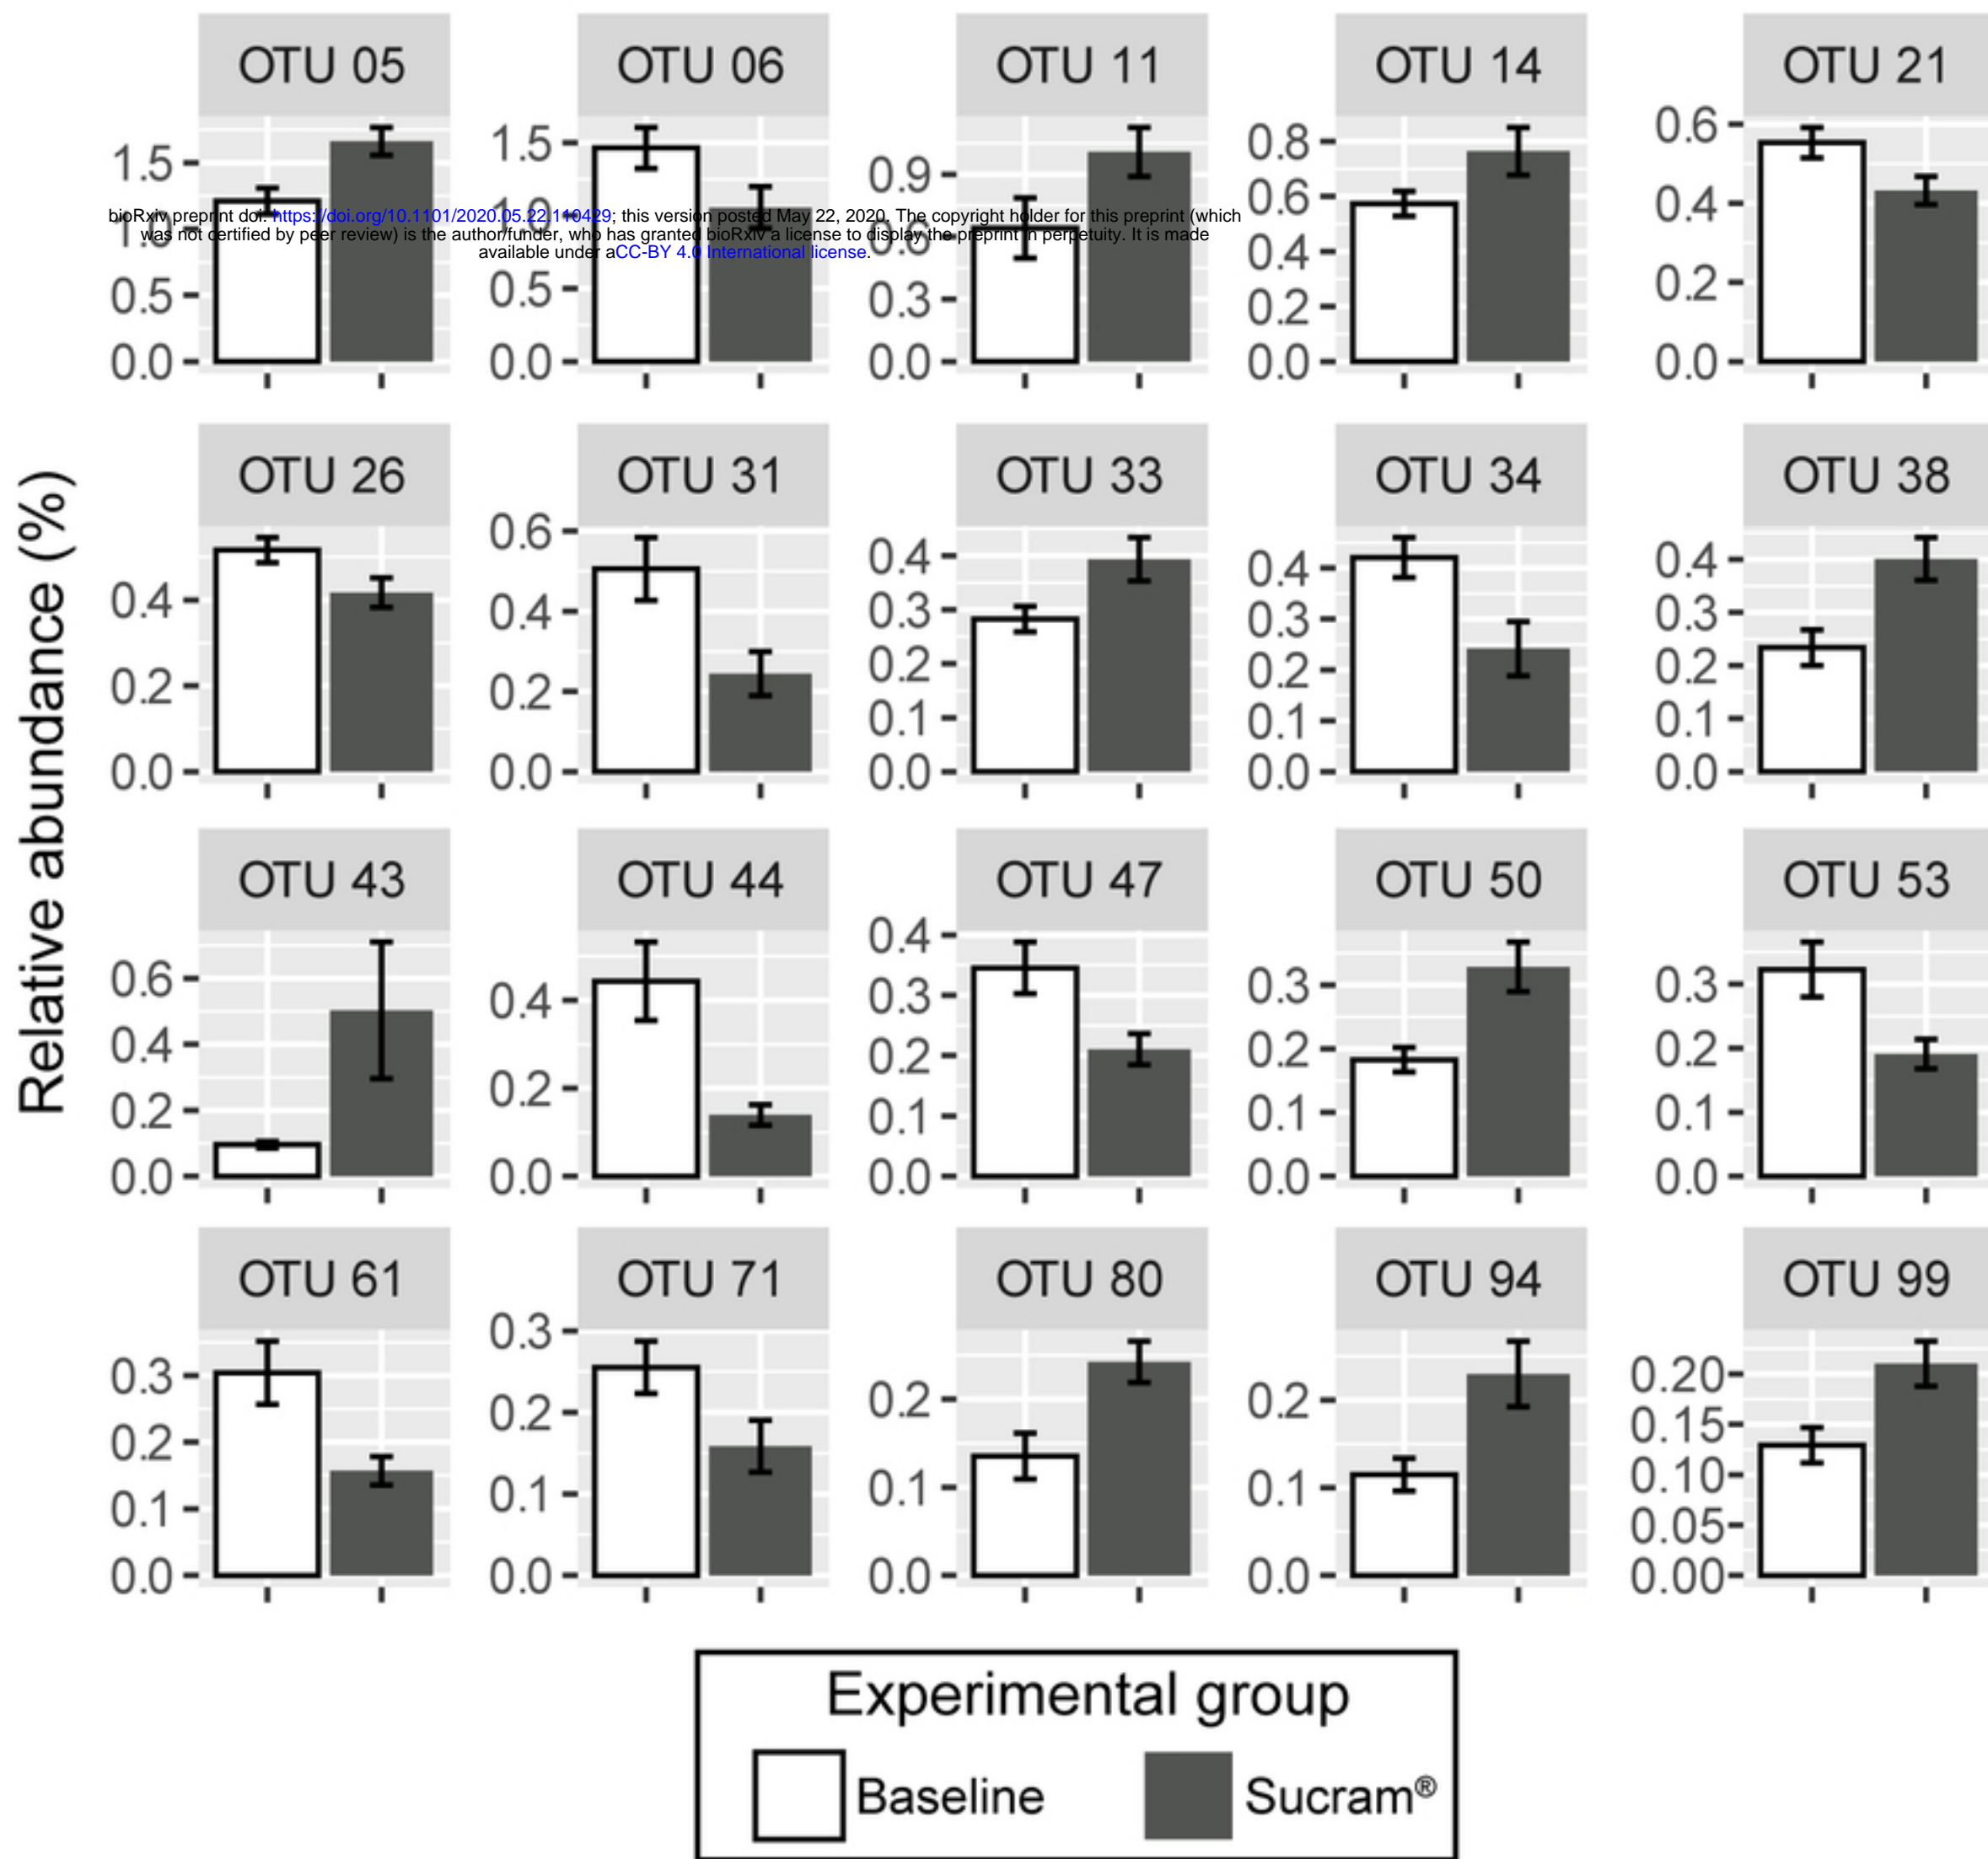

# Figure 4
